1 **Structure-function characterization of the conserved regulatory mechanism of**  
2 **the *Escherichia coli* M48-metalloprotease BepA**

3

4 Jack A. Bryant\*<sup>1</sup>, Ian T. Cadby\*<sup>1</sup>, Zhi-Soon Chong<sup>2</sup>, Yanina R. Sevastyanovich<sup>1</sup>,  
5 Faye C. Morris<sup>1</sup>, Adam F. Cunningham<sup>1</sup>, George Kritikos<sup>1</sup>, Richard W. Meek<sup>1</sup>,  
6 Manuel Banzhaf<sup>1</sup>, Shu-Sin Chng<sup>2</sup>, Andrew L. Lovering<sup>1</sup>, Ian R. Henderson<sup>1,3</sup>.

7

8 \* These authors should be considered joint first authors

9 <sup>1</sup>Institute of Microbiology and Infection, University of Birmingham, Edgbaston, Birmingham, B15 2TT.

10 <sup>2</sup>Department of Chemistry, National University of Singapore, Singapore 117543.

11 <sup>3</sup>Institute for Molecular Bioscience, University of Queensland, St. Lucia, 4072, Australia.

12

13 **Correspondence:** Jack A. Bryant (j.a.bryant@bham.ac.uk), Ian R. Henderson  
14 (i.henderson@imb.uq.edu.au)

15

16 Running title: Structure and functional analysis of BepA auto-regulation

17 **Abstract**

18

19 The asymmetric Gram-negative outer membrane (OM) is the first line of defence for  
20 bacteria against environmental insults and attack by antimicrobials. The key  
21 component of the OM is lipopolysaccharide, which is transported to the surface by the  
22 essential lipopolysaccharide transport (Lpt) system. Correct folding of the Lpt system  
23 component LptD is regulated by a periplasmic metalloprotease, BepA. Here we  
24 present the crystal structure of BepA from *Escherichia coli*, solved to a resolution of  
25 2.18 Å, in which the M48 protease active site is occluded by an active site plug.  
26 Informed by our structure, we demonstrate that free movement of the active site plug  
27 is essential for BepA function, suggesting that the protein is auto-regulated by the  
28 active site plug, which is conserved throughout the M48 metalloprotease family.  
29 Targeted mutagenesis of conserved residues reveals that the negative pocket and the  
30 TPR cavity are required for function and degradation of the BAM complex component  
31 BamA under conditions of stress. Lastly, we show that loss of BepA causes disruption  
32 of OM lipid asymmetry, leading to surface exposed phospholipid.

33

34 **Importance**

35

36 M48 metalloproteases are widely distributed in all domains of life. *E. coli* possesses  
37 four members of this family located in multiple cellular compartments. The functions  
38 of these proteases are not well understood. Recent investigations revealed that one  
39 family member, BepA, has an important role in the maturation of a central component  
40 of the LPS biogenesis machinery. Here we present the structure of BepA and the  
41 results of a structure guided mutagenesis strategy, which reveal the key residues  
42 required for activity.

43

44 **Keywords:** *Escherichia coli*, structure, BepA, lipopolysaccharide, LptD, M48  
45 metalloprotease, BAM Complex

46

47

## 48 **Introduction**

49

50 The outer membrane (OM) of Gram-negative bacteria is the first line of defence  
51 against environmental insults, such as antimicrobial compounds (1, 2). As such, the  
52 integrity of the OM must be maintained lest the bacteria become susceptible to  
53 stresses to which they would otherwise be resistant. The OM consists of an  
54 asymmetric bilayer of phospholipids and lipopolysaccharide (LPS) decorated with  
55 integral outer membrane proteins (OMPs) and peripheral lipoproteins. The  
56 impermeable nature of the OM can be attributed to several characteristics of the LPS  
57 leaflet, such as dense acyl chain packing, intermolecular bridging interactions and the  
58 presence of O-antigen carbohydrate chains (1, 3-7).

59

60 All the components required to construct the OM are synthesized in the cytoplasm.  
61 Specialized systems transport these molecules across the cell envelope and  
62 assemble the molecules into the OM in a coordinated fashion. Central to this is the  $\beta$ -  
63 barrel assembly machinery (BAM) complex. In *Escherichia coli*, the BAM complex is  
64 composed of two essential subunits, the OM  $\beta$ -barrel BamA and the lipoprotein BamD,  
65 and three non-essential accessory lipoproteins, BamB, BamC and BamE (8-11). The  
66 BAM complex is responsible for assembly of the Lpt system, which traffics LPS from  
67 the cytoplasm to the outer leaflet of the OM in order to maintain OM permeability  
68 barrier function (12-14). The Lpt machinery is comprised of three modules: the IM  
69 localized LptBFGC complex, which flips the LPS molecule across the IM and  
70 energizes the system; LptA, which forms a bridge between the IM and OM along which  
71 the LPS travels; and the OM complex LptD/E (12, 15, 16). The C-terminus of LptD  
72 forms an OM  $\beta$ -barrel which facilitates insertion of LPS directly into the outer leaflet of  
73 the OM (17, 18). The N-terminus encodes a periplasmic domain that interacts with the  
74 LptA bridging molecule (19). The two LptD domains are connected via two disulphide  
75 bonds, at least one of which is required for efficient function of the LptD/E complex  
76 (20, 21). Formation of the correct LptD disulphide bonds is reliant upon the periplasmic  
77 thiol-disulphide oxidoreductase, DsbA, as well as proper folding and insertion of the  
78 LptD  $\beta$ -barrel into the OM. The latter step is dependent on the BAM complex, and the  
79 interaction of LptD with its cognate OM lipoprotein partner LptE (20, 21). To be  
80 effective at LPS delivery and to maintain the integrity of the OM, maturation of the

81 LptD/E complex is tightly regulated. The proteases DegP, BepA and YcaL each have  
82 specific roles in LptD maturation. DegP is responsible for the degradation of misfolded  
83 LptD in the periplasm, whereas YcaL targets LptD which has docked with the Bam  
84 machinery, but stalled at an early step in folding. Lastly, BepA degrades LptD which  
85 has engaged with the Bam machinery but stalled during insertion of a nearly complete  
86 barrel (22).

87  
88 Amongst the LptD quality control proteases, BepA is different in that it also has  
89 chaperone activities, influences the insertion of other OMPs into the outer membrane  
90 and its deletion renders cells sensitive to multiple antibiotics (23, 24). The primary  
91 sequence of BepA indicates that this protein is a member of the M48 family of zinc  
92 metalloproteases, of which there are four in *E. coli*. The M48 proteases are  
93 characterized by an HExxH motif on the active site helix (25). The histidine residues  
94 within this motif act, usually with a third amino acid and a water molecule, to coordinate  
95 the metal ion, typically zinc, at the active site (26-28). In addition to the N-terminal M48  
96 protease domain, BepA has a C-terminal tetratricopeptide repeat (TPR) domain. TPR  
97 domains consist of a number of stacked repeats of  $\alpha$ -helix pairs, together forming a  
98 solenoid-like structure that is known to facilitate protein-protein interactions and multi-  
99 protein complex formation (29). Narita *et al.* reported that BepA has a dual role,  
100 degrading misfolded LptD, but also promoting correct folding and accumulation of the  
101 mature disulphide isomer of LptD (23). Further to this, the BepA protease has been  
102 shown to interact with the main BAM complex component, BamA, and to degrade  
103 BamA under conditions of stress created by the absence of the periplasmic OMP  
104 chaperone SurA (23).

105  
106 Following the work of Narita *et al.*(23) we sought to determine the structure of BepA  
107 to understand the roles of the TPR and M48 peptidase domains in substrate  
108 recognition and processing. During this study two papers from other groups were  
109 published using similar structural approaches. First, Daimon *et al.*(30) determined the  
110 crystal structure of the TPR domain of BepA in isolation and observed that this domain  
111 presents a negatively charged face which was postulated to recognize components of  
112 the Bam complex and LptD. Using protein cross-linking analysis, residues of the TPR  
113 domain were demonstrated to interact with BamA, BamC, BamD and LptD. Mutation

114 of the TPR residue F404 resulted in decreased proteolysis of BamA indicating that this  
115 residue is involved in targeting of the M48 protease domain of BepA to this substrate.  
116 More recently, Sharizal *et al.*(31) presented a full-length structure of the BepA TPR  
117 and M48 protease domains solved to 2.6 Å. In this structure the negatively charged  
118 TPR face noted by Daimon *et al.*(30) is largely buried, forming a peripheral association  
119 with the M48 protease domain. Using SAXS and engineered disulphide bonds, the  
120 potential for the TPR domain and M48 domain to move relative to one another was  
121 explored but the cross-linking experiments demonstrate that the TPR and M48  
122 domains likely remain in tight association. Whilst multiple mutations were made,  
123 designed from the full-length structure of BepA, none of these mutations lead to any  
124 significant observable phenotype when expressed in *E. coli*.

125

126 Here we present our independently solved 2.19 Å structure of near full-length BepA,  
127 encompassing the TPR and M48 domains. Our structure largely agrees with that of  
128 Sharizal *et al.*(31), providing further evidence that TPR movement relative to the M48  
129 domain is unlikely to be a mechanism of BepA function. Additionally, we noted the  
130 presence of an active site plug, the TPR cavity and the negatively charged pocket  
131 formed by the association of the BepA TPR and M48 domains, which we targeted for  
132 further study. Using structure-led mutagenesis studies we probed the roles of these  
133 three BepA structural elements and identify key residues in each that are required for  
134 BepA function. Furthermore, the active site plug of BepA is a structural element  
135 conserved in the M48 protease family and so our findings have broad ramifications for  
136 proteases involved in processing varied substrates across all domains of life.

137

## 138 **Results**

139 *The BepA structure reveals a nautilus-like structure with TPR:protease contacts*

140

141 The crystal structure of BepA<sub>L44-Y484</sub> was solved to a resolution of 2.18 Å by  
142 experimental phasing using the endogenous zinc co-purified with recombinant BepA  
143 protein, present in our structure at a 1:1 stoichiometry with BepA (data collection and  
144 refinement statistics reported in Table 1); we observe a single copy of BepA in the  
145 asymmetric unit. The structure revealed the TPR domain, consisting of 12 α-helices  
146 forming 4 TPR motifs and four non-TPR helices, in tight association with the M48 zinc-

147 metallopeptidase domain. This forms a nautilus-like fold with the TPR subdomain  
148 cupping the metallopeptidase domain (**Fig 1**). The high-resolution data presented here  
149 are in broad agreement with that presented previously (30, 31), however there are  
150 some differences of note. The BepA TPR sub-domain was previously annotated as  
151 being composed of four TPR motif helix pairs and two non-TPR helices (nTH1 and  
152 nTH2), we have thus adopted this nomenclature.

153  
154 Our structure demonstrates that the TPR domain consists of 12  $\alpha$ -helices, whereas  
155 the structure was previously annotated with 10  $\alpha$ -helices in order to maintain  
156 nomenclature with the previously solved TPR-domain structure of residues 310-482  
157 (30, 31). Despite the previous annotation as non-TPR helices, we observe that helices  
158 8 and 9 form part of the TPR domain and are preceded by an extended linker region,  
159 residues M263-S271, which connects the TPR domain to helix 7 of the protease  
160 domain (**Fig 1**). Helices 8 and 9 contribute a tight turn at the end of the TPR domain,  
161 allowing the M48 metallopeptidase domain to be cupped by the pocket formed from  
162 TPR motifs 2 and 3 (**Fig 1**). Interaction of the protease domain with the TPR pocket  
163 creates a larger negatively charged pocket, which is also noted in the structure  
164 presented by Shahrizal *et al.* (31). The context provided by the full-length protein  
165 structure shows that while the TPR pocket interacts with the protease domain, the  
166 TPR cavity is positioned away from the protease active site on the opposite side (**Fig**  
167 **1**). The cavity also comes into close proximity with the N-terminal helix, which is  
168 contained within the protease domain, therefore potentially facilitating TPR:protease  
169 domain communication.

170  
171 The protease domain of BepA consists of the active site  $\alpha$ -helix H4 containing the  
172 HExxH motif, and an active site plug formed by a loop between helices H6 and H7,  
173 residues S246-P249. We did not observe any density corresponding to positions  
174 L146-I194 and considering that this section is in close proximity to the active site, we  
175 expect that it may form a dynamic regulatory region (**Fig 1**). We sought to find  
176 evidence that the unresolved area of the protein may correspond to a dynamic lid.  
177 Therefore, we scrutinized the Protein Data Bank (PDB) for similar structures.  
178 Information on the missing region of our structure can be inferred from an unpublished  
179 structure in the PDB of an M48 zinc-metallopeptidase from *Geobacter sulfurreducens*,

180 which consists of only the protease domain, with no associated TPR (PDB: 3C37).  
181 The structure of the *G. sulfurreducens* protease structure provides some information  
182 on the missing section and demonstrates a short three-turn extension to the C-  
183 terminus of active site helix H4, beyond that seen in the BepA structure. This is  
184 followed by a glycine facilitated kink and another three helical turns terminating at  
185 residue D136 of the 3C37 structure (**Supplementary Fig S1**). The 3C37 structure is  
186 also missing a section, D136-N139, however residues M140-F149 form another short  
187  $\alpha$ -helical region, which is connected to the N-terminus of helix H5, by an extended  
188 region formed by residues G150-S158 of the 3C37 structure (**Supplementary Fig S1**).  
189 While also incomplete, the recently published BepA structure also provides some  
190 information on this section, which is also largely in agreement with that of the 3C37  
191 structure (**Supplementary Fig S1**) (31). Overall, comparison of the structure  
192 presented here, that of Shahrizal *et al.* (31) (PDB: 6AIT), and the *G. sulfurreducens*  
193 structure (PDB: 3C37), suggests that the missing section from the structure presented  
194 here may form a putative active site lid. The putative lid, along with the plug, likely  
195 regulates access to the active site as alignment of the three structures shows that the  
196 lid and plug occlude the active site (**Fig 1**). The fact that no density for the putative lid  
197 is observed in our structure, and that partial sections are missing in those presented  
198 previously, suggests that the active site lid is dynamic and may adopt multiple  
199 conformations.

200

201 *Mobility of the conserved active site plug is required for BepA function*

202

203 The structure shows the HExxH motif, which is characteristic of zinc-dependent  
204 metallopeptidases (25, 27) and is found within helix H4 (**Fig 1**). The active site zinc  
205 ion is coordinated by H136 and H140 within the HExxH motif, E201 contributed by  
206 helix H5, and H246 on a loop that forms the small  $\alpha$ -helical active site plug (**Fig 1**).  
207 Multiple alignment of the four *E. coli* M48 metallopeptidases, HtpX, YcaL, LoiP and  
208 BepA demonstrates that zinc coordinating residues are all conserved along with the  
209 proline following H246, P247, and an arginine further towards the C-terminus, R252,  
210 which resides within the active site (**Fig 2A and Fig 3A**). Analysis of the HMM logo  
211 generated for the M48 metallopeptidase family demonstrated that not only is the  
212 HExxH motif and the zinc-coordinating glutamic acid conserved, but the H-P-x(4)-R

213 motif within the active site plug is also conserved throughout the whole pfam family  
214 (PFO1435), which includes proteins from all domains of life (**Fig 2B**). The active site  
215 zinc ion is usually chelated by three amino acid residues and one water molecule,  
216 which is utilized to catalyze proteolysis of the substrate (26, 28). Co-ordination of the  
217 zinc ion by H246 fulfils the fourth ligand, therefore suggesting that a rearrangement of  
218 the active site plug should be required for proteolytic activity. Alignment with the  
219 structure of human nuclear membrane zinc metalloprotease, ZMPSTE24, with a  
220 bound substrate peptide (PDB: 2YPT) reveals that the BepA active site plug occupies  
221 the same physical space as the substrate for ZMPSTE24 would occupy (**Fig 3B**).  
222 Residue H246 on the BepA active site plug directly clashes with positioning of  
223 substrate in the 2YPT structure and the hydrophobic residues I242 and L243 occupy  
224 a similar space to the 2YPT substrate hydrophobic residues I3' and M4' (**Fig 3B**).  
225 Based on these observations, we hypothesized that the active site plug occludes the  
226 active site and is likely to relocate in order to facilitate substrate access to the active  
227 site (**Fig 1 and Fig 3B**).

228

229 To test the importance of H246 in occupying the fourth coordination site on the zinc  
230 ion, we generated a mutation of the H246 position to asparagine (H246N). For  
231 comparison, we also constructed the E137Q mutation in the active helix HExxH motif,  
232 which has previously been shown to prevent protease activity of BepA (23). To test  
233 whether the H246N BepA mutant is functional, we assayed the ability of this mutant to  
234 complement the  $\Delta bepA$  strain, which is known to exhibit increased sensitivity to large  
235 antibiotics such as vancomycin, presumably due to impaired barrier function of the  
236 OM. The E137Q active site mutant was incapable of restoring vancomycin resistance  
237 to  $\Delta bepA$  cells and had a severe negative effect on the growth of the  $\Delta bepA$  mutant  
238 (**Fig 3C**). The H246N mutant BepA was also incapable of complementing vancomycin  
239 sensitivity of the  $\Delta bepA$  cells; however, while the H246N protein also severely  
240 increased the vancomycin sensitivity of the mutant beyond that of the empty vector  
241 control, the negative effect was less extreme than with the E137Q version of the  
242 protein (**Fig 3C**). Considering this phenotype, we decided to investigate if the mutated  
243 proteins had a dominant-negative effect in the parent background expressing wild-  
244 type *bepA*. We found that the empty vector and wild-type BepA had no detrimental  
245 effect on BW25113 parent cells grown in the presence of vancomycin. Our analysis of



246 the E137Q mutant was in agreement with previous studies when analyzed in the  
247 parent background and demonstrated a severe dominant-negative phenotype (23).  
248 We also observed that the presence of H246N BepA had a dominant-negative effect  
249 on the capacity of the cells to grow in the presence of vancomycin, despite the  
250 presence of wild-type BepA expressed from the chromosomal locus. Similar to the  
251 effect in the mutant background, the dominant-negative effect of the H246N protein  
252 was less severe than that of the E137Q derivative (**Fig 3C**). We speculate that this is  
253 may be because the active site plug is less able to interact with the active site zinc ion  
254 and that the protein may be in a constitutively activated or “de-regulated” conformation  
255 (**Fig 1 and Fig 3**). Western blotting to detect the expression of BepA proteins in whole  
256 cell lysates using anti-6xHis antibodies showed an elevated level of the E137Q protein  
257 compared to wild-type and an absence of observable tagged protein in the H246N  
258 sample. These observations were consistent between the  $\Delta bepA$  and parent  
259 backgrounds (**Supplementary Fig S2**). These results support the hypothesis that the  
260 E137Q mutation renders BepA protease inactive, therefore stabilizing the protein due  
261 to a lack of auto-proteolytic activity, which has been observed previously (23).  
262 Considering that the H246N BepA has a dominant-negative effect, the absence of a  
263 detectable tagged protein by western blot suggests the C-terminal His-tag may be  
264 auto-proteolytically degraded, an observation that has previously been made for the  
265 wild type BepA protein (23). This data supports the hypothesis that the H246N  
266 mutation gives rise to a protein with de-regulated proteolytic activity.

267  
268 In order to test if the auto-proteolysis of the H246N protein was due to increased  
269 protease activity, we introduced the established protease dead mutation E137Q. The  
270 BepA E137Q H246N substitution was not capable of complementing the vancomycin  
271 sensitivity and had a severe dominant-negative effect similar to that of E137Q alone  
272 (**Fig 3C**). Analysis of the E137Q H246N BepA protein by western blot showed a similar  
273 level of tagged protein to the E137Q protein (**Supplementary Fig S2**). These data  
274 suggest that introduction of the E137Q mutation either prevents auto-proteolysis of  
275 the C-terminal 6xHIS tag in the H246N mutant or alternatively stabilizes the protein,  
276 preventing it from being targeted by other periplasmic proteases.

277

278 The importance of residue H246 for BepA function, and the conformation of the active  
279 site plug observed in our crystal structure, suggests this may be an inactive form of  
280 the protein. Therefore, we hypothesized that movement of the active site plug must be  
281 required to facilitate substrate access to the active site. We aimed to tether the active  
282 site in the conformation observed in our crystal structure by engineering a disulphide  
283 bond. Cysteine substitutions were introduced into proximal sites in BepA, specifically  
284 at positions E103, in the loop between S1 and S2, and E241 in the active site plug,  
285 either individually or in concert (**Fig 4A**). The single cysteine substitutions  
286 complemented the sensitivity phenotype, indicating that the single substitutions had  
287 no impact on BepA function. However, the double cysteine mutant was incapable of  
288 restoring vancomycin resistance to the *bepA* mutant under normal growth conditions.  
289 In contrast, in the presence of the reducing agent TCEP (tris(2-  
290 carboxyethyl)phosphine), the double cysteine mutant was able to complement  
291 vancomycin sensitivity (**Fig 4B**). The double cysteine mutant also caused a severe  
292 dominant negative effect in the parent background, which was alleviated by the  
293 presence of the reducing agent TCEP, therefore allowing free movement of the  
294 regulatory active site plug and normal functioning of BepA (**Fig 4B**). These  
295 observations suggest that in the E103C E241C BepA a disulphide bond was formed  
296 that tethered the active site plug in the inactive conformation, causing similar effects  
297 to the E137Q protease-dead mutation and that free movement of the plug is essential  
298 to function (**Fig 4B**).

299

300 *The BepA negative pocket and TPR cavity are required for function and BepA-*  
301 *mediated degradation of BamA*

302

303 The TPR domain contains two potential substrate binding sites, termed the “pocket”  
304 on the protease proximal face and the “cavity” on the protease distal face (**Fig 1 and**  
305 **Fig 5**). We identified two conserved charged residues, R280 and D347, in the BepA  
306 TPR pocket, which forms a larger negatively charged cleft through interaction with the  
307 protease domain (**Fig 5A**). The negatively charged cleft is connected to the active site  
308 via a negatively charged ditch and has previously been hypothesized to facilitate  
309 substrate interactions (31). However, no evidence for the importance of this site for  
310 BepA function has yet been provided. We targeted these two conserved charged  
311 residues within the pocket, and vancomycin sensitivity assays revealed that the R280

312 mutations had no significant effect on complementation of the *bepA* mutant. However,  
313 the D347R mutation had a mild negative effect on the capacity of the BepA protein to  
314 complement the vancomycin sensitivity of the *bepA* mutant and a dominant-negative  
315 effect in the parent background, despite the protein being expressed to a lower level  
316 than the WT protein (**Supplementary Fig S2 and S3**).

317

318 The effect of D347R is weak by comparison with the active site mutations, therefore  
319 we utilized a more sensitive permeability assay to assess the mutation. Vancomycin  
320 is a large (1450 Da) hydrophobic antibiotic that does not normally penetrate the OM.  
321 The target for vancomycin is the abundant D-alanyl-D-alanine substrate, which must  
322 bind in sufficient quantity to exhibit an effect on cell growth/lysis. Chlorophenyl red- $\beta$ -  
323 D-galactopyranoside (CPRG) is a hydrophobic  $\beta$ -galactosidase substrate that is  
324 smaller (585 Da), but also fails to penetrate wild-type *E. coli*. OM permeability defects  
325 allow penetration of CPRG into the cell where it is then accessible to cytoplasmic  $\beta$ -  
326 galactosidase, which hydrolyses the CPRG to produce a red colour (32, 33).  
327 Production of the red colour is a sensitive indicator of cell permeability and thus can  
328 be measured using a time resolved wavescan of cells grown on LB agar supplemented  
329 with CPRG (33, 34). The BW25113 parent strain is Lac<sup>-</sup>, therefore strains were co-  
330 transformed with the relevant *bepA* encoding plasmid and a *lacZYA* expression vector  
331 (32, 33, 35). CPRG assays indicated that the *bepA* mutant cells are indeed more  
332 permeable to the  $\beta$ -galactosidase substrate CPRG and that this permeability  
333 phenotype can be complemented (**Fig 5B**). Active site mutants E137Q or H246N that  
334 cause increased vancomycin sensitivity when compared to the *bepA* mutant empty  
335 vector control are not able to restore the OM barrier against CPRG. The conditions  
336 used for the assay here appear to be too sensitive to measure the differences between  
337 the empty vector control, E137Q and H246N mutants that are apparent from  
338 vancomycin sensitivity screening (**Fig 5B**). However, the increased sensitivity of the  
339 assay showed that mutations altering conserved residues in the pocket (R280M,  
340 D347R) are not able to fully complement the permeability defect (**Fig 5B**). This  
341 suggests that the phenotypes caused by these mutations are mild compared to the  
342 active site mutations. The mild permeability phenotype could explain the lack of  
343 observable vancomycin sensitivity despite increased permeability to CPRG.

344

345 We next sought to assess the cavity in the TPR domain, which has been shown to be  
346 involved in BepA binding to the Bam complex (30). Conservation analysis revealed  
347 two conserved arginine residues, R466 and R470, which have yet to be analyzed for  
348 their role in BepA function. We expected these residues might be involved in substrate  
349 recognition or interaction with protein complex partners due to the prominent position  
350 in the cavity and their high level of conservation despite any obvious structural role  
351 **(Fig 5A)**. Mutation of these residues to alanine appeared to have no impact on the  
352 capacity of the BepA protein to complement the vancomycin sensitivity phenotype  
353 **(Supplementary Fig S3)**. However, the CPRG permeability assay demonstrated that  
354 R466 and R470 are indeed required for full complementation of the OM permeability  
355 defect caused by loss of BepA **(Fig 5B)**.

356  
357 BepA has been shown to degrade the BAM complex component BamA under  
358 conditions of stress induced by the absence of the chaperone SurA (23). Considering  
359 that the TPR cavity has been shown to interact with Bam complex subunits (30), and  
360 that we observed cell permeability defects on complementation with the TPR cavity  
361 mutants, we reasoned that these mutants may be defective in BepA-mediated  
362 degradation of BamA. Therefore, we analyzed whole cell lysates from  $\Delta b e p A \Delta s u r A$   
363 cells expressing WT BepA or the R280M, R280Q, D347R, R466A or R470A  
364 derivatives of BepA by western immuno-blotting with anti-serum raised against  
365 POTRA domain five of BamA (36). As has been demonstrated previously, we  
366 observed that introduction of WT BepA into the cells leads to generation of an anti-  
367 BamA antibody reactive BamA degradation product of approximately 40 kDa (23)**(Fig**  
368 **5C)**. Production of the putative BamA degradation product was not detectable in cells  
369 expressing the R280M derivative or in cells expressing BepA with substitutions in the  
370 TPR cavity (R466A and R470A), all of which had the most severe permeability defects  
371 in this set **(Fig 5B and 5C)**. In contrast, production of the putative BamA degradation  
372 product was unaffected in cells expressing the negative pocket derivatives R280Q and  
373 D347R, which were also less permeable to CPRG than the other mutants assayed  
374 **(Fig 5B and 5C)**. These data suggest that these residues are important for BepA-  
375 mediated degradation of BamA in the absence of the chaperone SurA. This also  
376 supports the previous observation that the TPR cavity is required for interaction with  
377 the Bam complex (30).

378

379 *Loss of BepA leads to increased surface exposed phospholipid*

380

381 It has been established that *bepA* mutant *E. coli* are more sensitive to hydrophobic  
382 antibiotics with a high molecular mass, such as vancomycin, erythromycin, rifampicin  
383 and novobiocin (23). This is presumed to be due to increased OM permeability. The  
384 hypothesis is that the loss of BepA results in reduced LptD assembly, therefore leading  
385 to reduced OM LPS content. This would in turn cause phospholipids to flip from the  
386 inner leaflet to the outer leaflet of the OM, creating a perturbation in OM lipid  
387 asymmetry and increased OM permeability to large antibiotics (22, 23, 37). While it  
388 has been established that the  $\Delta$ *bepA* cells are more permeable, as demonstrated here  
389 by increased permeability to CPRG, this is not necessarily evidence of perturbed OM  
390 lipid asymmetry. Perturbation of OM lipid asymmetry can be detected through  
391 monitoring the activity of the enzyme PagP. On detecting surface exposed  
392 phospholipids, the OM localized Lipid A palmitoyltransferase PagP, utilizes the outer  
393 leaflet phospholipids as palmitate donors to convert hexa-acylated Lipid A to hepta-  
394 acylated Lipid A (38-40). The resulting lyso-phospholipid product is then degraded by  
395 the OM phospholipase PldA (**Fig 6A**). To measure the levels of hepta-acylated Lipid  
396 A, radiolabelled Lipid A was isolated from the  $\Delta$ *bepA* mutant or bacteria that had been  
397 complemented with BepA, BepA E137Q or BepA H246N. The lipids were then  
398 separated by thin layer chromatography. The parent strain BW25113, transformed  
399 with empty pET20b, were treated with EDTA prior to Lipid A isolation, a process that  
400 is known to induce high levels of hepta-acylated Lipid A production and act as a  
401 positive control (41-43). Cells lacking BepA showed a significant increase in the levels  
402 of hepta-acylated Lipid A in relation to hexa-acylated Lipid A, indicating perturbation  
403 of OM lipid asymmetry in the absence of functional BepA (**Fig 6B and 6C**). While the  
404 catalytically dead E137Q and the H246N mutants were not able to rescue this defect,  
405 they also did not appear to significantly increase the levels of hepta-acylated Lipid A  
406 compared to cells lacking BepA (**Fig 6B and 6C**). Additionally, we did not see any  
407 effect on lipid A palmitoylation for any of the other mutations used in this study.  
408 However, we suggest that this is likely due to the sensitivity of the assay. These data  
409 demonstrate that loss of BepA leads to an increase in surface exposed phospholipid,  
410 which is likely the cause of increased permeability.

411

## 412 **Discussion**

413

414 In this study, we present the structure of full-length BepA at a resolution of 2.18 Å,  
415 which is a periplasmic M48 zinc metalloprotease family protein involved in regulating  
416 the maturation of the LPS biogenesis machinery in Gram-negative bacteria. Our  
417 independently-solved structure guided our mutagenesis strategy to identify and  
418 investigate the mechanism of the BepA active site plug, which contains a conserved  
419 motif found throughout the M48-metalloprotease family. The structure presented here  
420 is missing density for a region near to the active site. Comparison to structural data  
421 available in the PDB demonstrated that this region corresponds to what appears to be  
422 an active site lid that in part occludes access to the active site residues (31). The three  
423 available structures all demonstrate some missing density within the lid, therefore this  
424 could be explained by flexibility within this region to facilitate substrate access to the  
425 active. This highlights an attractive area for future study into the regulatory  
426 mechanisms employed by BepA and the M48 metalloproteases.

427

428 In combination with the active site lid, access to the site is also blocked by the active  
429 site plug, which we focused on here. We have shown that H246N within a small helix  
430 on the active site loop coordinates the zinc in our structure and is essential for correct  
431 function of BepA. Through the use of disulphide bond tethering, we also demonstrate  
432 that the plug must be mobile for function of the protein. This suggests that the plug  
433 may act in an auto-regulatory function to either block the active site or move to facilitate  
434 access for the substrate and proteolytic activity. Three other M48 family  
435 metalloproteases are annotated in *E. coli*: the OM lipoprotein LoiP, with which BepA  
436 has been shown to interact (44); the IM heat-shock induced endopeptidase, HtpX (45);  
437 and the recently characterized OM lipoprotein YcaL, which is also involved in the  
438 regulation of LptD insertion into the OM (22). We assessed conservation within these  
439 four metalloproteases and found that the key active site plug residues are conserved  
440 amongst these proteins. Through analysis of the HMM logo for the M48 family of  
441 metalloproteases we observed that the regulatory plug mechanism is conserved  
442 throughout the whole pfam protein family (PF01435) and is found in all domains of life  
443 (46). The regulatory plug is characterized by two conserved residues, H246 and P247,  
444 and the active site contains one further conserved arginine leading to a conserved

445 motif, H-P-x(4)-R. Addition of the regulatory plug motif to the characteristic H-E-x-x-H-  
446 motif of zinc metallopeptidases allows the specific identification of this protein family  
447 within *E. coli* by using the online pattern search tool MOTIF2  
448 (<https://www.genome.jp/tools/motif/MOTIF2.html>) using the pattern search H-E-x-x-H-  
449 x(30,140)-H-P-x(4)-R. The results of this search, in *E. coli*, identify three proteins other  
450 than the four M48 family metallopeptidases. One of these is a prophage cell-death  
451 peptidase encoded by the *lit* gene, which is classified as the single member of the U49  
452 peptidase family. We anticipate that this peptidase and the rest of the M48 family of  
453 zinc metallopeptidases are likely to be auto-regulated by a conserved H-P-motif active  
454 site plug mechanism similar to that of BepA (**Fig 7**). Therefore, identification of this  
455 motif will be important for identifying the active site plug mechanism in future studies  
456 involving this family of proteins, which is found in all domains of life.

457

458 We identify specific residues in the pocket and cavity formed by the TPR that are  
459 important for function. The TPR cavity has previously been shown to be the site of  
460 interaction with the Bam complex (30) and here we demonstrate that specific  
461 conserved arginine residues within the cavity are important for function and for BepA-  
462 mediated degradation of BamA under conditions of stress. While this shows that these  
463 residues within TPR are important for BepA function, and potentially substrate  
464 recognition, this is not illuminating for the substrate recognition mechanisms of the  
465 three remaining *E. coli* M48 metalloproteases. YcaL and LoiP are OM lipoproteins that  
466 lack the TPR (22, 44), therefore they do not contain the key residues identified here in  
467 the BAM complex interaction cavity or the negatively charged ditch that we  
468 demonstrate as important for function. YcaL has been shown to target BAM-engaged  
469 substrates that have yet to fold (22). However, considering that it lacks the TPR  
470 domain, which is required for BepA interaction with the BAM complex (30), it must  
471 recognize the complex and the stalled substrate through a different mechanism. While  
472 the other *E. coli* M48 metalloproteases lack the TPR domain they do all contain the  
473 active site plug. This will require further study, but we anticipate that our  
474 characterization of the BepA active site plug will be of value for further study of the  
475 remaining Gram-negative M48 metalloproteases and indeed for proteins in a wide-  
476 range of other organisms.

477

478 **Methods**

479

#### 480 *Expression and purification of BepA*

481

482 The BepA open reading frame, including N-terminal signal peptide, was codon  
483 optimized for expression in *E. coli* and cloned into the IPTG inducible vector pET20b  
484 fused to a C-terminal His<sub>6</sub>-tag (a service provided by Genscript). This vector was  
485 transformed into *E. coli* DE3 cells and used for recombinant protein production. Briefly,  
486 overnight cultures grown in LB media at 37°C were used as the inoculum for auto-  
487 induction media supplemented with 10 μM ZnCl<sub>2</sub>. The resulting cultures were grown  
488 at 37°C to an OD<sub>600</sub> of ~0.8 before the temperature was changed to 18°C for ~18  
489 hours. Cells were harvested by centrifugation and cell pellets were stored at -80°C.

490

491 To purify His-tagged BepA, cell pellets were resuspended in buffer A (20 mM  
492 imidazole, pH 7.5; 400 mM NaCl) supplemented with 0.05% Tween20 and lysed by  
493 sonication. Cell lysates were clarified by ultra-centrifugation and then incubated with  
494 Super Ni-NTA agarose resin (Generon) at 4°C with gentle agitation overnight. The  
495 incubation mixture was centrifuged briefly, the supernatant was removed, and the  
496 resin was resuspended in buffer A before being loaded onto a gravity-flow purification  
497 column. The resin was washed extensively with buffer A, then with 20 ml of Buffer A  
498 supplemented with 50 mM imidazole, before washing with buffer B (400 mM imidazole,  
499 pH 7.5; 400 mM NaCl; 2 % glycerol). BepA protein, eluted in buffer B, was dialyzed  
500 against buffer C (20 mM MES, pH 6.5; 5 mM EDTA) at 18°C for 6 h (to remove metals  
501 co-purified with BepA protein) and then dialyzed, extensively with sequential buffer  
502 changes, against buffer D (as buffer C but lacking EDTA and instead supplemented  
503 with 10 μM ZnCl<sub>2</sub> and 150 mM LiSO<sub>4</sub>) at 18°C. BepA protein was concentrated to ~60  
504 mg/ml by ultra-filtration and then further purified on a HiLoad Superdex 200 26/600  
505 column (GE Healthcare) equilibrated in buffer D. Fractions containing pure BepA  
506 protein were pooled and concentrated to 35 mg/ml for use in crystallization trials.

507

#### 508 *Crystallization and determination of BepA structure*

509

510 Purified recombinant BepA was used with proprietary crystal screens (supplied by  
511 Molecular Dimensions and Jena Bioscience) in sitting drop crystallization experiments  
512 using 2 μl of protein solution and 2 μl of crystallization mother liquor at 18°C. Large



513 crystals were obtained in 0.1 M Na HEPES, pH 7.0, and 8% w/v PEG 8,000 and grew  
514 within 30 days. Crystals were cryo-protected by step-wise addition of mother liquor  
515 supplemented with 25 % ethylene glycol prior to flash freezing in liquid nitrogen.

516

517 Protein crystals were used in X-ray diffraction experiments at the Diamond Light  
518 Source synchrotron facility (Oxford, UK). Data for SAD experimental phasing was  
519 collected at a wavelength of 1.28 Å and was processed using XDS. A single atom of  
520 Zn<sup>2+</sup> (co-purified with BepA) was identified using SHELXD. This initial map was used  
521 for auto-building with Phenix. Models were improved by iterations of refinement using  
522 Phenix and manual manipulations in COOT.

523

#### 524 *Conservation analysis*

525

526 The consurf server was used to analyze conservation of surface residues. A multiple  
527 alignment of BepA homologues was generated using Clustal Omega and submitted to  
528 the consurf server along with the BepA pdb file as a basis for conservation analysis.  
529 Further to this, the amino acid sequence of the four M48 metalloproteases encoded  
530 by *E. coli* were used to generate a multiple alignment by using Clustal Omega and  
531 visualized using ESPript 3.0 ( <http://esript.ibcp.fr>) (**Fig S4**). Lastly, Pfam was used to  
532 visualize conservation within the M48 metalloprotease family through use of the HMM  
533 logo and the Skyline web server (<http://skylign.org>.) (46-48).

534

#### 535 *Mutagenesis of bepA*

536

537 Mutations in *bepA* were created using a PCR-based site directed mutagenesis  
538 approach using the pET20b::*bepA*::6xHis vector as template. Briefly,  
539 pET20b::*bepA*::6xHis vector was used in 18 cycles of PCR using the Phusion  
540 polymerase (NEB) as described by the manufacturer, but using complementary  
541 primers containing the desired mutation flanked by at least 15-bp of sequence (Table  
542 S1). As a negative control, replica reactions were set up and the polymerase omitted.  
543 Template DNA was then digested by addition of 20 units (1 µl) *DpnI* restriction enzyme  
544 (NEB: R0176S) and incubation at 37°C for 1 h. The reaction mixture was then used to

545 directly transform NEB DH5- $\alpha$  high-efficiency competent cells. Mutations were  
546 confirmed by plasmid isolation and Sanger sequencing (Source Bioscience).

547

#### 548 *Functional screening of mutant bepA*

549

550 Parent or  $\Delta bepA$  cells were first transformed with the appropriate  
551 pET20b::*bepA*::6xHis vector and stored as glycerol stocks at -80°C. Starter cultures  
552 were generated by growth overnight (~16 h) at 37°C with aeration in LB broth (10 g/L  
553 tryptone; 5 g/L yeast extract; 5 g/L NaCl) supplemented with 100  $\mu$ g/ml carbenicillin.  
554 Cells were normalized to OD<sub>600</sub> = 1 and then 10-fold serially diluted before 1.5  $\mu$ l was  
555 spotted onto the relevant LB agar plates. Cells were then incubated at 37°C overnight  
556 (~16 h) and the plates photographed for record. Cells were screened on LB agar plates  
557 supplemented with 100  $\mu$ g/ml carbenicillin, vancomycin at the stated concentrations  
558 and 2 mM TCEP (tris(2-carboxyethyl)phosphine) where stated.

559

#### 560 *Western immuno-blotting*

561

562 To examine the expression of BepA in  $\Delta bepA$  or parent *E. coli*, cells were grown as  
563 described for the functional screening of mutant BepA experiments. For analysis of  
564 BepA-mediated degradation of BamA, cells were grown for 16 hours at 37°C in M9  
565 minimal media, supplemented with 0.1% casamino acids, 0.4% glucose, 2 mM  
566 MgSO<sub>4</sub>, but with CaCl<sub>2</sub> omitted. The OD<sub>600</sub> of the cultures was recorded and cells  
567 were isolated by centrifugation then resuspended in Laemmli buffer so that the number  
568 of cells in each sample was equivalent. Samples were boiled for 10 min, followed by  
569 a brief centrifugation step before being resolved by SDS-PAGE and subjected to  
570 western blotting using anti-6xhis antibodies (TaKaRa: 631212), or anti-BamA POTRA  
571 antiserum (36), as primary antibody and HRP conjugated anti-rabbit (Sigma Aldrich:  
572 A6154) antibodies as secondary for detection by use of the ECL system. Samples  
573 were loaded in duplicate and subjected to SDS-PAGE simultaneously, followed by  
574 coomassie staining and visualization.

575

#### 576 *CPRG permeability assay*

577

578 Following double transformation with the relevant pET20b::*bepA*::6xHis plasmid and  
579 the pRW50/CC-61.5 *lac* reporter plasmid (35), cells were grown to mid-exponential  
580 phase (OD<sub>600</sub> 0.4-0.6) in LB broth with aeration and harvested by centrifugation. Cells  
581 were resuspended in LB broth to an OD<sub>600</sub> of 0.1 and 5 µl used to inoculate 96-well  
582 culture plates containing 150 µl LB agar supplemented with CPRG (Chlorophenol red-  
583 β-D-galactopyranoside – Sigma) (20 µg/ml), carbenicillin (100 µg/ml) and tetracycline  
584 (15 µg/ml). 96-well plates were incubated at 30°C and the optical density 300-800 nm  
585 monitored every 20 min for 48 h. By using the absorbance of LacZ<sup>-</sup> strains unable to  
586 turn over CPRG, we created an estimating function that predicts the expected  
587 absorbance due to cell growth at 575 nm (CPR peak absorbance) using the  
588 absorbance at 450 nm and 650 nm. By subtracting the actual absorbance at 575 nm,  
589 from the expected growth-related absorbance we derive the CPRG turnover score,  
590 which is exclusive to cell membrane permeability. For both expected and measured  
591 absorbance at 575 nm, the timepoint of 24 h post-inoculation was used.

592

#### 593 *LPS labelling, Lipid A isolation and analysis*

594

595 Labelling of LPS, Lipid A purification, TLC analysis and quantification were done  
596 exactly as described previously (42). Briefly, starter cultures were incubated at 37°C  
597 overnight with aeration in LB broth supplemented with 100 µg/ml carbenicillin. Starter  
598 cultures were then subcultured into 5 ml LB broth supplemented with 100 µg/ml  
599 carbenicillin and the experiment completed precisely as described previously including  
600 the addition of the positive control, in which the parent strain was exposed to 25 mM  
601 EDTA for 10 min prior to harvest of cells by centrifugation in order to induce PagP  
602 mediated palmitoylation of Lipid A (42). Experiments were completed in triplicate and  
603 the data generated was analyzed as described previously.

604

#### 605 ***Data Availability***

606

607 The BepA X-ray structure has been deposited in the PDB with the accession number  
608 6SAR.

609

#### 610 ***Acknowledgements***

611

612 We thank Professor Jeff Cole for stimulating discussion and assistance with  
613 manuscript editing. This work was funded by BBSRC and MRC grants to IRH. The  
614 lipid A palmitoylation work was supported by the Singapore Ministry of Education  
615 Academic Research Fund Tier 2 (MOE2013-T2-1-148) grant (to SSC).

616

### 617 ***Conflict of interest***

618

619 The authors declare that they have no conflicts of interest with the contents of this  
620 article.

621

### 622 ***Author contributions***

623

624 BepA was identified as a target for study by FM and the project was facilitated by IRH.  
625 The BepA mutant was made by FM. Production of the protein was completed by YS,  
626 whereas further production, purification, crystallization and modelling of the BepA  
627 structure was done by ITC and ALL. Consurf analysis, mutagenesis, western blotting  
628 and functional analysis screens were done by JAB with guidance from ALL. Lipid A  
629 palmitoylation assays were done by JAB and ZSC under the supervision of SSC.  
630 CPRG permeability assays were also completed by JAB with the advice and  
631 supervision of MB. CPRG assay data was processed and analyzed by MB and GK.  
632 Manuscript preparation was completed by JAB and general project design was done  
633 by JAB with the guidance of ALL and IRH. JAB, IRH, MB, ITC and ALL contributed to  
634 manuscript editing.

## 635 References

- 636 1. May KL, Grabowicz M. 2018. The bacterial outer membrane is an evolving antibiotic  
637 barrier. *Proceedings of the National Academy of Sciences of the United States of*  
638 *America* 115:8852-8854.
- 639 2. Nikaido H. 2003. Molecular basis of bacterial outer membrane permeability revisited.  
640 *Microbiol Mol Biol Rev* 67:593-656.
- 641 3. Zgurskaya HI, López CA, Gnanakaran S. 2015. Permeability Barrier of Gram-Negative  
642 Cell Envelopes and Approaches To Bypass It. *ACS Infect Dis* 1:512-522.
- 643 4. Sperandeo P, Martorana AM, Polissi A. 2017. Lipopolysaccharide biogenesis and  
644 transport at the outer membrane of Gram-negative bacteria. *Biochim Biophys Acta*  
645 *Mol Cell Biol Lipids* 1862:1451-1460.
- 646 5. Konovalova A, Kahne DE, Silhavy TJ. 2017. Outer Membrane Biogenesis. *Annu Rev*  
647 *Microbiol* 71:539-556.
- 648 6. Osborn MJ, Gander JE, Parisi E, Carson J. 1972. Mechanism of assembly of the outer  
649 membrane of *Salmonella typhimurium*. Isolation and characterization of cytoplasmic  
650 and outer membrane. *J Biol Chem* 247:3962-72.
- 651 7. Silhavy TJ, Kahne D, Walker S. 2010. The bacterial cell envelope. *Cold Spring Harb*  
652 *Perspect Biol* 2:a000414.
- 653 8. Wu T, Malinverni J, Ruiz N, Kim S, Silhavy TJ, Kahne D. 2005. Identification of a  
654 multicomponent complex required for outer membrane biogenesis in *Escherichia coli*.  
655 *Cell* 121:235-45.
- 656 9. Iadanza MG, Higgins AJ, Schiffrin B, Calabrese AN, Brockwell DJ, Ashcroft AE, Radford  
657 SE, Ranson NA. 2016. Lateral opening in the intact beta-barrel assembly machinery  
658 captured by cryo-EM. *Nat Commun* 7:12865.
- 659 10. Mahoney TF, Ricci DP, Silhavy TJ. 2016. Classifying beta-Barrel Assembly Substrates by  
660 Manipulating Essential Bam Complex Members. *J Bacteriol* 198:1984-92.
- 661 11. Knowles TJ, Scott-Tucker A, Overduin M, Henderson IR. 2009. Membrane protein  
662 architects: the role of the BAM complex in outer membrane protein assembly. *Nat Rev*  
663 *Microbiol* 7:206-14.
- 664 12. Bohl TE, Aihara H. 2018. Current Progress in the Structural and Biochemical  
665 Characterization of Proteins Involved in the Assembly of Lipopolysaccharide. *Int J*  
666 *Microbiol* 2018:5319146.
- 667 13. Chng SS, Gronenberg LS, Kahne D. 2010. Proteins required for lipopolysaccharide  
668 assembly in *Escherichia coli* form a transenvelope complex. *Biochemistry* 49:4565-7.
- 669 14. Ma B, Reynolds CM, Raetz CR. 2008. Periplasmic orientation of nascent lipid A in the  
670 inner membrane of an *Escherichia coli* LptA mutant. *Proc Natl Acad Sci U S A*  
671 105:13823-8.
- 672 15. Sherman DJ, Xie R, Taylor RJ, George AH, Okuda S, Foster PJ, Needleman DJ, Kahne D.  
673 2018. Lipopolysaccharide is transported to the cell surface by a membrane-to-  
674 membrane protein bridge. *Science* 359:798-801.
- 675 16. Suits MD, Sperandeo P, Deho G, Polissi A, Jia Z. 2008. Novel structure of the conserved  
676 gram-negative lipopolysaccharide transport protein A and mutagenesis analysis. *J Mol*  
677 *Biol* 380:476-88.
- 678 17. Qiao S, Luo Q, Zhao Y, Zhang XC, Huang Y. 2014. Structural basis for lipopolysaccharide  
679 insertion in the bacterial outer membrane. *Nature* 511:108-11.

- 680 18. Dong H, Xiang Q, Gu Y, Wang Z, Paterson NG, Stansfeld PJ, He C, Zhang Y, Wang W,  
681 Dong C. 2014. Structural basis for outer membrane lipopolysaccharide insertion.  
682 Nature 511:52-6.
- 683 19. Chng SS, Ruiz N, Chimalakonda G, Silhavy TJ, Kahne D. 2010. Characterization of the  
684 two-protein complex in Escherichia coli responsible for lipopolysaccharide assembly  
685 at the outer membrane. Proc Natl Acad Sci U S A 107:5363-8.
- 686 20. Chng SS, Xue M, Garner RA, Kadokura H, Boyd D, Beckwith J, Kahne D. 2012. Disulfide  
687 rearrangement triggered by translocon assembly controls lipopolysaccharide export.  
688 Science 337:1665-8.
- 689 21. Ruiz N, Chng SS, Hiniker A, Kahne D, Silhavy TJ. 2010. Nonconsecutive disulfide bond  
690 formation in an essential integral outer membrane protein. Proc Natl Acad Sci U S A  
691 107:12245-50.
- 692 22. Soltes GR, Martin NR, Park E, Sutterlin HA, Silhavy TJ. 2017. Distinctive Roles for  
693 Periplasmic Proteases in the Maintenance of Essential Outer Membrane Protein  
694 Assembly. J Bacteriol 199.
- 695 23. Narita S, Masui C, Suzuki T, Dohmae N, Akiyama Y. 2013. Protease homolog BepA  
696 (YfgC) promotes assembly and degradation of beta-barrel membrane proteins in  
697 Escherichia coli. Proc Natl Acad Sci U S A 110:E3612-21.
- 698 24. Oh E, Becker AH, Sandikci A, Huber D, Chaba R, Gloge F, Nichols RJ, Typas A, Gross CA,  
699 Kramer G, Weissman JS, Bukau B. 2011. Selective ribosome profiling reveals the  
700 cotranslational chaperone action of trigger factor in vivo. Cell 147:1295-308.
- 701 25. Hooper NM. 1994. Families of zinc metalloproteases. FEBS Lett 354:1-6.
- 702 26. Hangauer DG, Monzingo AF, Matthews BW. 1984. An interactive computer graphics  
703 study of thermolysin-catalyzed peptide cleavage and inhibition by N-carboxymethyl  
704 dipeptides. Biochemistry 23:5730-41.
- 705 27. Matthews BW. 1988. Structural basis of the action of thermolysin and related zinc  
706 peptidases. Accounts of Chemical Research 21:333-340.
- 707 28. Matthews BW, Jansonius JN, Colman PM, Schoenborn BP, Dupourque D. 1972. Three-  
708 dimensional structure of thermolysin. Nat New Biol 238:37-41.
- 709 29. Perez-Riba A, Itzhaki LS. 2019. The tetratricopeptide-repeat motif is a versatile  
710 platform that enables diverse modes of molecular recognition. Curr Opin Struct Biol  
711 54:43-49.
- 712 30. Daimon Y, Iwama-Masui C, Tanaka Y, Shiota T, Suzuki T, Miyazaki R, Sakurada H,  
713 Lithgow T, Dohmae N, Mori H, Tsukazaki T, Narita SI, Akiyama Y. 2017. The TPR domain  
714 of BepA is required for productive interaction with substrate proteins and the beta-  
715 barrel assembly machinery complex. Mol Microbiol 106:760-776.
- 716 31. Shahrizal M, Daimon Y, Tanaka Y, Hayashi Y, Nakayama S, Iwaki S, Narita SI, Kamikubo  
717 H, Akiyama Y, Tsukazaki T. 2019. Structural Basis for the Function of the beta-Barrel  
718 Assembly-Enhancing Protease BepA. J Mol Biol 431:625-635.
- 719 32. Kritikos G, Banzhaf M, Herrera-Dominguez L, Koumoutsi A, Wartel M, Zietek M, Typas  
720 A. 2017. A tool named Iris for versatile high-throughput phenotyping in  
721 microorganisms. Nat Microbiol 2:17014.
- 722 33. Paradis-Bleau C, Kritikos G, Orlova K, Typas A, Bernhardt TG. 2014. A genome-wide  
723 screen for bacterial envelope biogenesis mutants identifies a novel factor involved in  
724 cell wall precursor metabolism. PLoS Genet 10:e1004056.
- 725 34. Banzhaf M, Yau HC, Verheul J, Lodge A, Kritikos G, Mateus A, Cordier B, Hov AK, Stein  
726 F, Wartel M, Pazos M, Solovyova AS, Breukink E, van Teeffelen S, Savitski MM, den

- 727 Blaauwen T, Typas A, Vollmer W. 2020. Outer membrane lipoprotein Nlpl scaffolds  
728 peptidoglycan hydrolases within multi-enzyme complexes in *Escherichia coli*. *Embo j*  
729 39:e102246.
- 730 35. Gaston K, Bell A, Kolb A, Buc H, Busby S. 1990. Stringent spacing requirements for  
731 transcription activation by CRP. *Cell* 62:733-43.
- 732 36. Rossiter AE, Leyton DL, Tveen-Jensen K, Browning DF, Sevastyanovich Y, Knowles TJ,  
733 Nichols KB, Cunningham AF, Overduin M, Schembri MA, Henderson IR. 2011. The  
734 essential  $\beta$ -barrel assembly machinery complex components BamD and BamA are  
735 required for autotransporter biogenesis. *J Bacteriol* 193:4250-3.
- 736 37. Ruiz N, Kahne D, Silhavy TJ. 2009. Transport of lipopolysaccharide across the cell  
737 envelope: the long road of discovery. *Nat Rev Microbiol* 7:677-83.
- 738 38. Bishop RE, Gibbons HS, Guina T, Trent MS, Miller SI, Raetz CR. 2000. Transfer of  
739 palmitate from phospholipids to lipid A in outer membranes of gram-negative  
740 bacteria. *Embo j* 19:5071-80.
- 741 39. Hwang PM, Choy WY, Lo EI, Chen L, Forman-Kay JD, Raetz CR, Prive GG, Bishop RE, Kay  
742 LE. 2002. Solution structure and dynamics of the outer membrane enzyme PagP by  
743 NMR. *Proc Natl Acad Sci U S A* 99:13560-5.
- 744 40. Dekker N. 2000. Outer-membrane phospholipase A: known structure, unknown  
745 biological function. *Mol Microbiol* 35:711-7.
- 746 41. Yeow J, Tan KW, Holdbrook DA, Chong ZS, Marzinek JK, Bond PJ, Chng SS. 2018. The  
747 architecture of the OmpC-MlaA complex sheds light on the maintenance of outer  
748 membrane lipid asymmetry in *Escherichia coli*. *J Biol Chem* 293:11325-11340.
- 749 42. Chong ZS, Woo WF, Chng SS. 2015. Osmoporin OmpC forms a complex with MlaA to  
750 maintain outer membrane lipid asymmetry in *Escherichia coli*. *Mol Microbiol* 98:1133-  
751 46.
- 752 43. Jia W, El Zoeiby A, Petruzzello TN, Jayabalasingham B, Seyedirashti S, Bishop RE. 2004.  
753 Lipid trafficking controls endotoxin acylation in outer membranes of *Escherichia coli*.  
754 *J Biol Chem* 279:44966-75.
- 755 44. Lutticke C, Hauske P, Lewandrowski U, Sickmann A, Kaiser M, Ehrmann M. 2012. *E. coli*  
756 LoIP (YggG), a metalloprotease hydrolyzing Phe-Phe bonds. *Mol Biosyst* 8:1775-82.
- 757 45. Kornitzer D, Teff D, Altuvia S, Oppenheim AB. 1991. Isolation, characterization, and  
758 sequence of an *Escherichia coli* heat shock gene, *htpX*. *J Bacteriol* 173:2944-53.
- 759 46. Finn RD, Bateman A, Clements J, Coghill P, Eberhardt RY, Eddy SR, Heger A,  
760 Hetherington K, Holm L, Mistry J, Sonnhammer EL, Tate J, Punta M. 2014. Pfam: the  
761 protein families database. *Nucleic Acids Res* 42:D222-30.
- 762 47. Schuster-Bockler B, Schultz J, Rahmann S. 2004. HMM Logos for visualization of  
763 protein families. *BMC Bioinformatics* 5:7.
- 764 48. Wheeler TJ, Clements J, Finn RD. 2014. Skylign: a tool for creating informative,  
765 interactive logos representing sequence alignments and profile hidden Markov  
766 models. *BMC Bioinformatics* 15:7.
- 767 49. Madeira F, Park YM, Lee J, Buso N, Gur T, Madhusoodanan N, Basutkar P, Tivey ARN,  
768 Potter SC, Finn RD, Lopez R. 2019. The EMBL-EBI search and sequence analysis tools  
769 APIs in 2019. *Nucleic Acids Res* 47:W636-w641.
- 770 50. Robert X, Gouet P. 2014. Deciphering key features in protein structures with the new  
771 ENDscript server. *Nucleic Acids Res* 42:W320-4.
- 772 51. Quigley A, Dong YY, Pike AC, Dong L, Shrestha L, Berridge G, Stansfeld PJ, Sansom MS,  
773 Edwards AM, Bountra C, von Delft F, Bullock AN, Burgess-Brown NA, Carpenter EP.

774            2013. The structural basis of ZMPSTE24-dependent laminopathies. Science 339:1604-  
775            7.  
776  
777



778 **Table 1 - Data collection and refinement statistics**  
779

|                                    |                                |
|------------------------------------|--------------------------------|
| <b>Data collection</b>             |                                |
| Space group                        | P 21 21 21                     |
| Cell dimensions                    |                                |
| <i>a</i> , <i>b</i> , <i>c</i> , Å | 53.12, 77.02, 124.60           |
| $\alpha$ , $\beta$ , $\gamma$ , °  | 90.00, 90.00, 90.00            |
| Resolution, Å                      | 77.02 - 2.18                   |
| <i>I</i> / $\sigma$ <i>I</i>       | 2.65 (at 2.18 Å)               |
| Completeness, %                    | 98.9 (91.5)                    |
| Redundancy                         | 16.5 (6.0)                     |
| <b>Refinement</b>                  |                                |
| Resolution, Å                      | 2.18                           |
| No. of reflections                 |                                |
| Rwork/Rfree                        | 0.176 / 0.201                  |
| No. of atoms                       | 3269                           |
| Protein                            | 3143                           |
| Ligand/ion                         | 6                              |
| Water                              | 120                            |
| <i>B</i> -factors                  | 47.0                           |
| Protein                            | 43                             |
| Ligand/ion                         | 71 (SO <sub>4</sub> ), 37 (Zn) |
| Water                              |                                |
| rmsd                               |                                |
| Bond lengths, Å                    | 0.006                          |
| Bond angles, °                     | 1.00                           |

780 \*Values in parentheses are for highest-resolution shell.  
781  
782

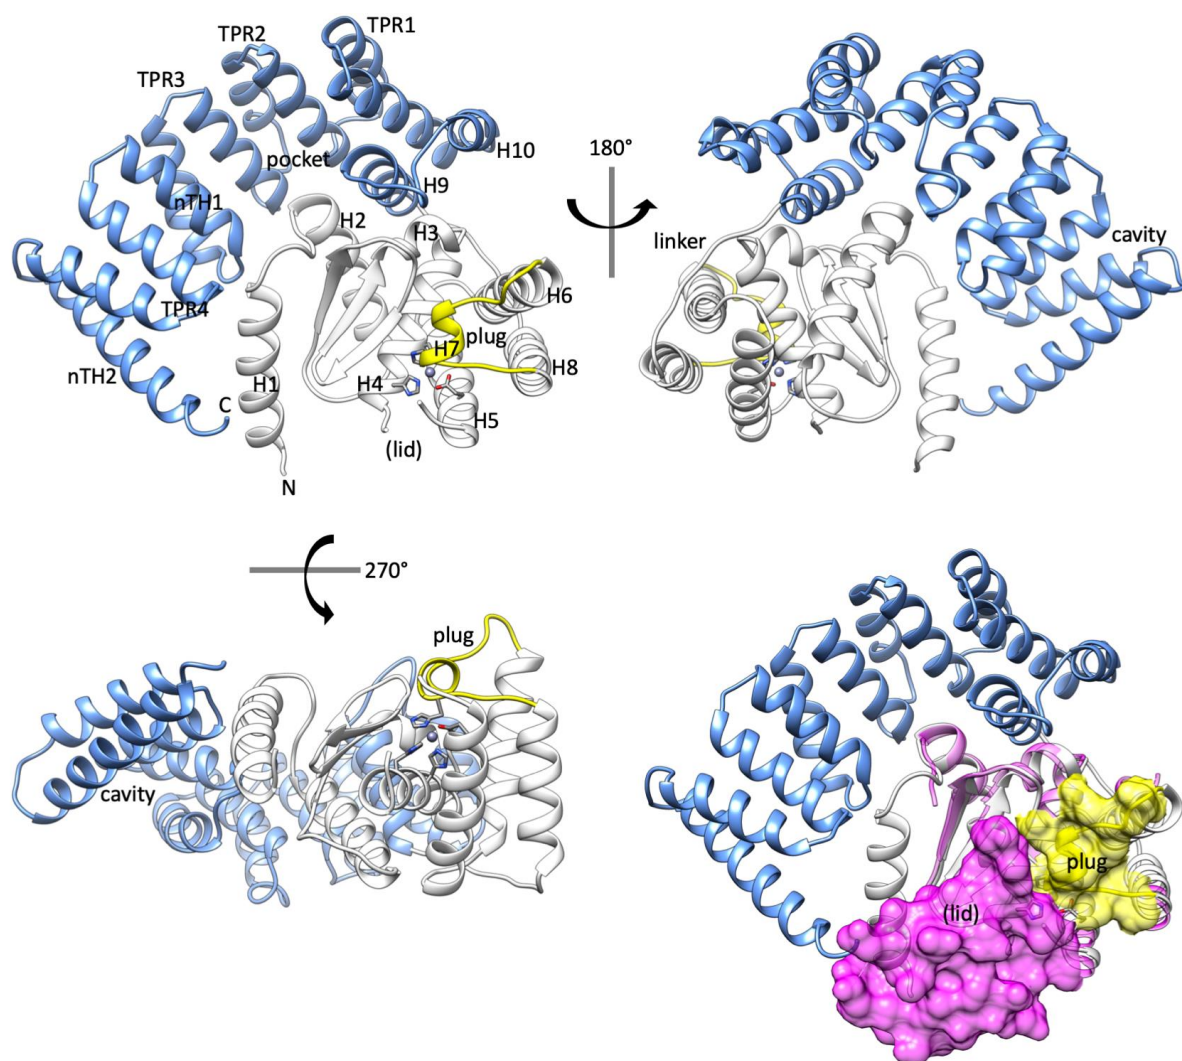

783  
784  
785  
786  
787  
788  
789  
790  
791  
792  
793  
794  
795  
796  
797

**Figure 1 – The structure of BepA reveals an occluded active site**

Cartoon schematic of the X-ray crystallography structure of BepA, solved to a resolution of 2.18 Å. The TPR domain is represented in blue and the protease domain in white with the active site plug in yellow. Also labelled are the N- and C- termini, TPR pocket, TPR cavity, the linker and the site at which we expect the active site lid (lid). Important active site residues H136, H140, H246 and E201 are shown by stick diagram. The TPR motifs 1-4, non-TPR helices 1 and 1 (nTH1 and nTH2), helices, sheets and the plug labelled. Alignment of the structure presented here with that of the *G. sulfurreducens* M48 metalloprotease (PDB: 3C37 – Magenta ribbon) reveals occlusion of the active site by the potential active site lid (lid) represented as magenta surface density from the 3C37 structure and the active site plug (plug) represented as yellow surface density.

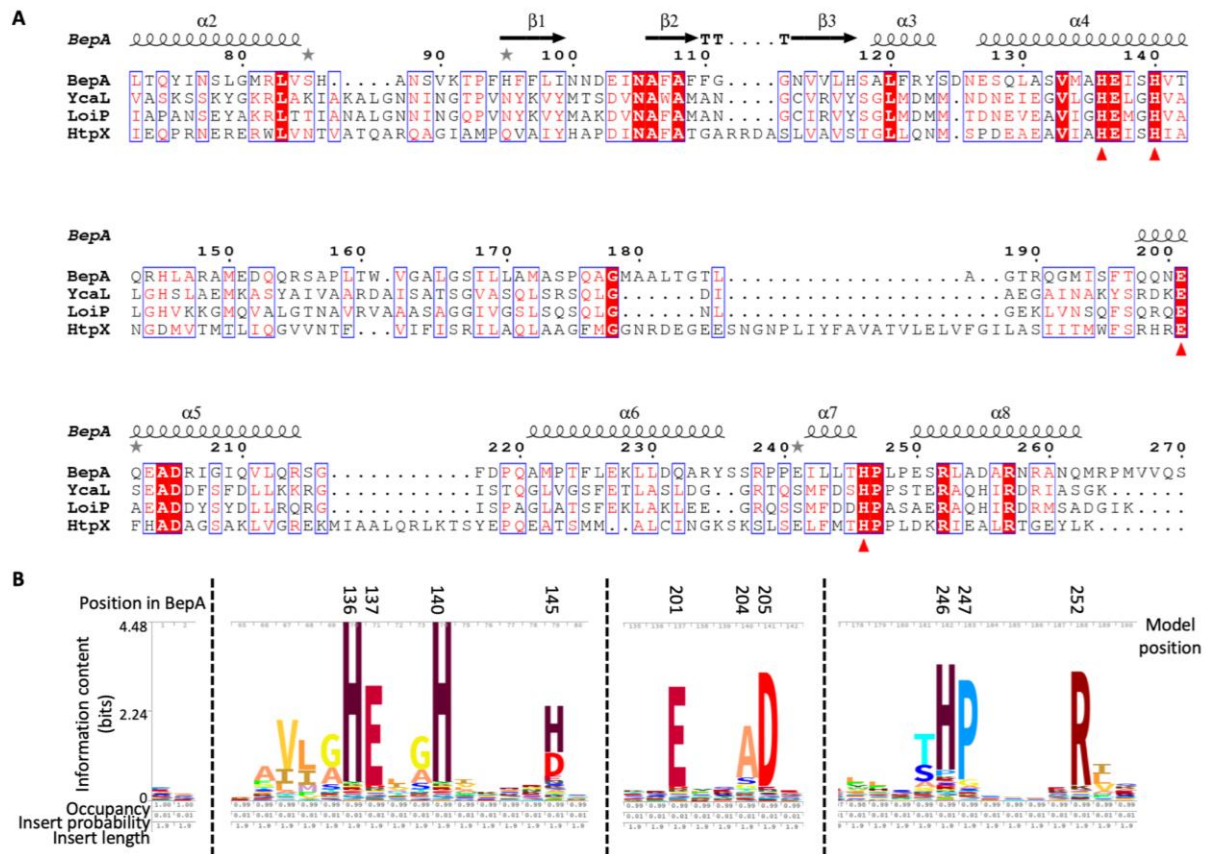

798  
799

**Figure 2 – Conservation of the M48 metalloprotease HExxH motif and active site plug residues**

800 **A.** Amino acid sequences for *E. coli* BepA, YcaL, LoiP and HtpX were submitted to  
 801 Clustal Omega (<https://www.ebi.ac.uk/Tools/msa/clustalo/>) in order to generate a  
 802 multiple alignment to allow analysis of amino acid conservation and subsequently  
 803 processed using ESPrnt 3.0 (<http://esprnt.ibcp.fr>) (49, 50). Sequences are named on  
 804 the left and numbered above the line based on the BepA sequence. Gaps in the  
 805 alignment are represented by dots. A single fully conserved residue is highlighted red  
 806 and the zinc co-ordinating residues are labelled with a red triangle under the residue.  
 807 BepA secondary structure is represented on the top line with  $\alpha$ -helices labelled with a  
 808 spiral and  $\beta$ -sheets by arrows. The protease domain sub-section of the alignment is  
 809 shown, for the full alignment see Figure S3. **B.** HMM logo generated for the pfam M48  
 810 family of metalloproteases (PF01435) from the pfam website (<https://pfam.xfam.org>)  
 811 with the HMM profile constructed on the pfam seed alignment. Three sections of the  
 812 alignment are shown, which demonstrate conservation of the active site zinc co-  
 813 ordinating residues H136, H140, E201 and H246. The active site plug clearly contains  
 814 a conserved motif, H-P-x(4)-R. Amino acid position in BepA and within the model are  
 815 both shown with the stack height corresponding to information content (bits), which  
 816 represents the invariance of the position. Letter height divides the stack height  
 817 according to letter frequency.  
 818  
 819

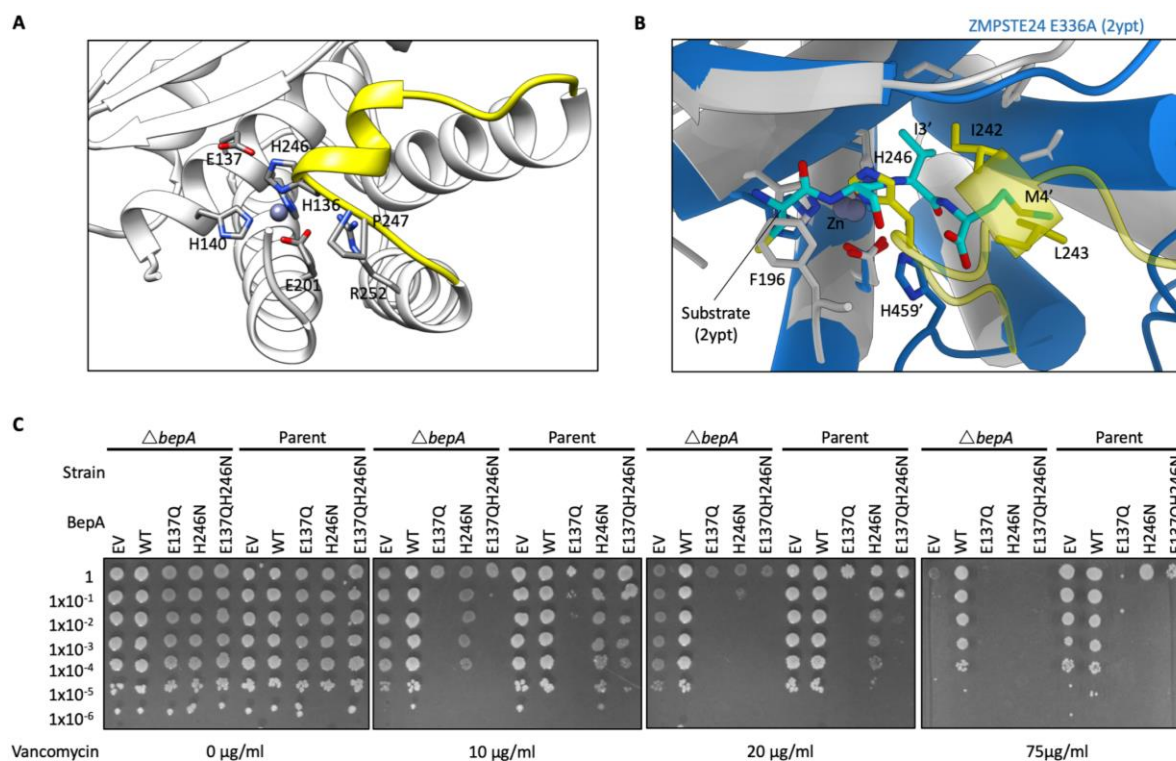

820  
821  
822  
823  
824  
825  
826  
827  
828  
829  
830  
831  
832  
833  
834  
835  
836

**Figure 3 – The BepA active site plug acts to regulate BepA proteolytic activity**  
 Analysis of the BepA structure suggested a regulatory role for the active site plug, therefore plasmids encoding mutated *bepA* were screened for their capacity to complement the vancomycin sensitivity of  $\Delta b e p A$  *E. coli*. **A.** Structural diagram of the BepA active site with key conserved residues represented by stick diagram and labelling. **B.** Alignment of the BepA active site (transparent white and yellow ribbon) with that of the human nuclear membrane zinc metalloprotease ZMPSTE24 mutant E336A with a synthetic substrate peptide (PDB: 2YPT) (51) (Opaque blue ribbon) 2YPT residues are labelled with the addition of a ' symbol. **C.** Screen for vancomycin sensitivity of cells carrying pET20b encoding WT or mutated copies of BepA in the parent or  $\Delta b e p A$  strain background. The empty vector control is labelled EV. Cells are normalised to  $OD_{600} = 1$  and ten-fold serially diluted before being spotted on the LB agar containing the indicated antibiotics (all plates contain 100  $\mu\text{g/ml}$  carbenicillin additionally).

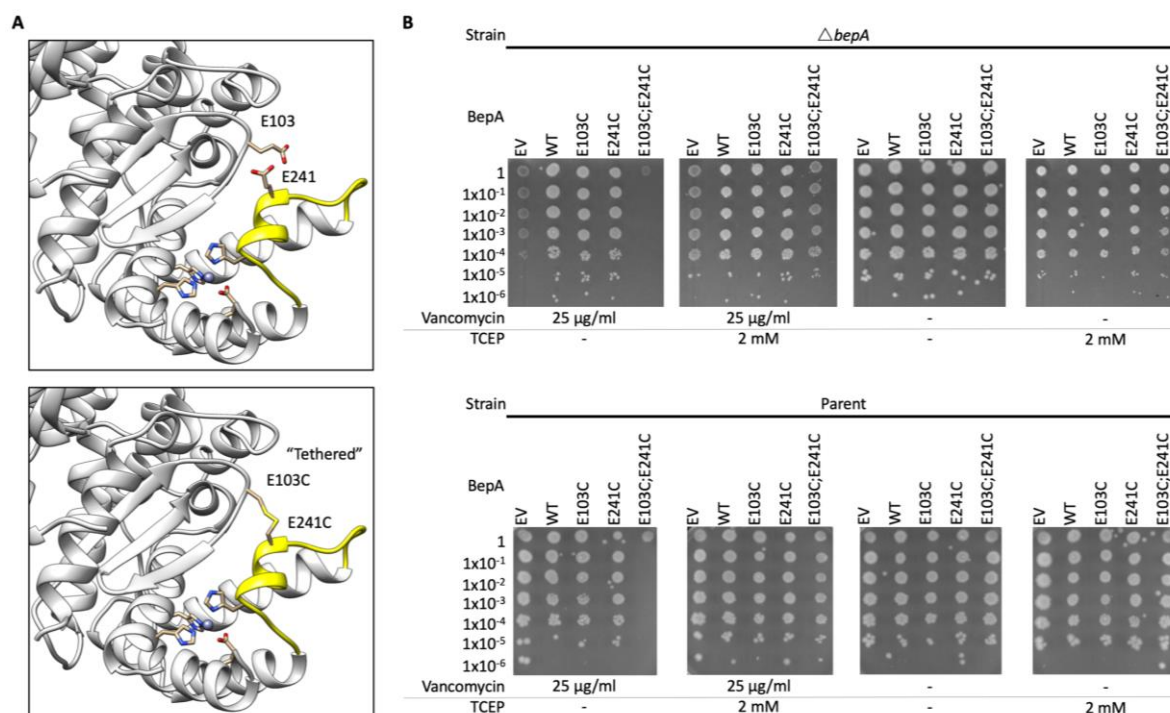

837  
838  
839  
840  
841  
842  
843  
844  
845  
846  
847  
848  
849

**Figure 4 – Flexibility of the active site plug is required for BepA function**

The requirement for flexibility of the BepA active site plug for full BepA function was assayed by disulphide bond tethering of the active site plug and functional screening. **A.** Structural representation of the BepA active site with residues targeted for mutation to cysteine, E103 and E241, labelled and coloured yellow. **C.** Screen for vancomycin sensitivity of cells carrying pET20b encoding WT or mutated copies of BepA in the parent or  $\Delta bepA$  strain background. The empty vector control is labelled EV. Cells are normalised to  $OD_{600} = 1$  and ten-fold serially diluted before being spotted on the LB agar containing the indicated antibiotics or reducing agent TCEP (all plates contain 100  $\mu\text{g/ml}$  carbenicillin additionally).

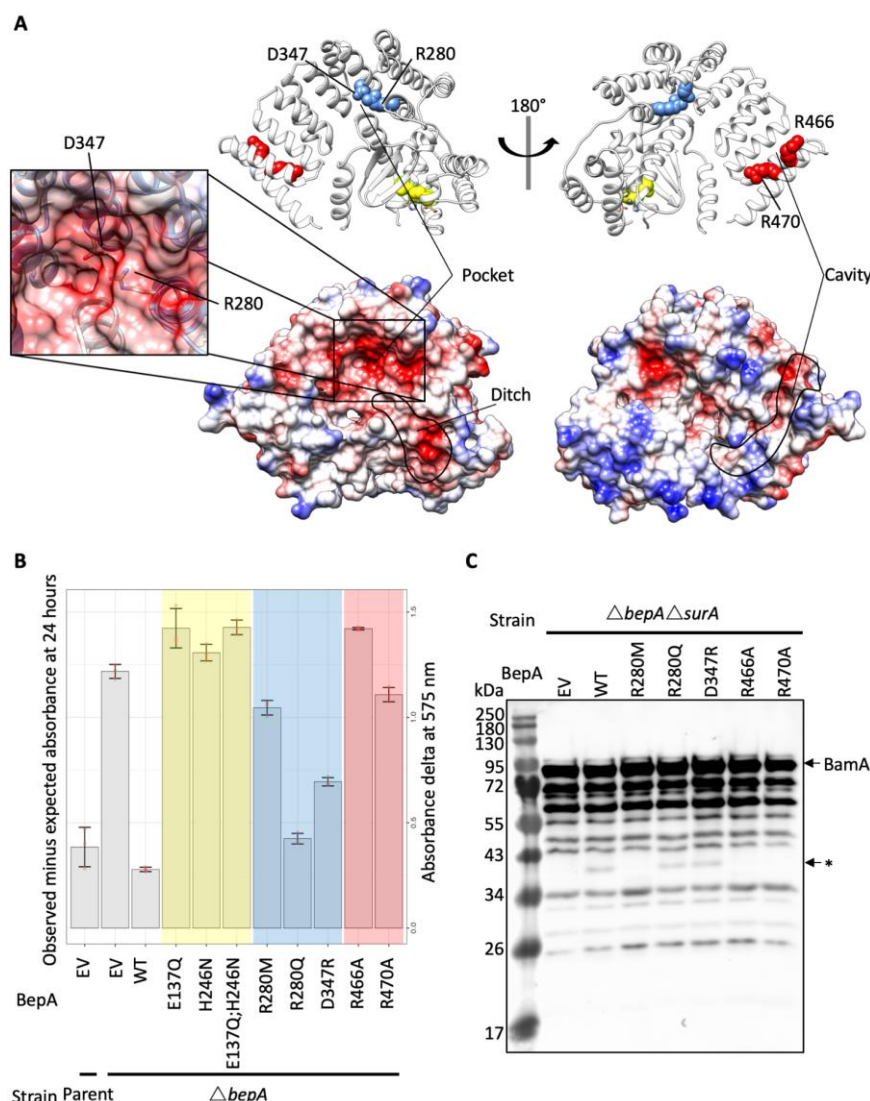

850  
851  
852  
853  
854  
855  
856  
857  
858  
859  
860  
861  
862  
863  
864  
865  
866  
867  
868  
869  
870

## Figure 5 – Conserved residues in the pocket and TPR cavity are required for function

The BepA pocket and TPR cavity contain conserved residues that were mutated to test their importance for BepA function. **A**. Structure of BepA showing residues targeted for mutation as colour-coded spheres that match the colour-coded chart represented in panel B. Also shown are surface representations of BepA in the same orientations coloured according to surface charge from red for negatively charged, through white for near neutral to blue for positive charge. The zoom-in box depicts the position of the key D347 and R280 residues. **B**. CPRG permeability assay of Parent or  $\Delta$ bepA cells carrying pET20b with WT or mutant copies of BepA as indicated. The empty vector control is labelled as EV. The CPRG turnover score (change in absorbance at OD<sub>575</sub> compared to the Lac<sup>-</sup> cells) is represented for two independent experiments each containing three replicates. **C**. The R280M, R466A and R470A substitutions prevent BepA-dependent generation of a putative BamA degradation product in the  $\Delta$ surA background. Total cellular protein extracts were prepared from  $\Delta$ bepA $\Delta$ surA cells carrying pET20b encoding WT or mutated copies of BepA. The empty vector control is labelled EV. Samples were separated by SDS-PAGE and transferred to nitrocellulose membrane for western immuno-blotting using antisera raised in rabbits against the BamA POTRA domain. The putative BamA degradation product is labelled with an arrow and asterisk (\*), with the full length BamA labelled.

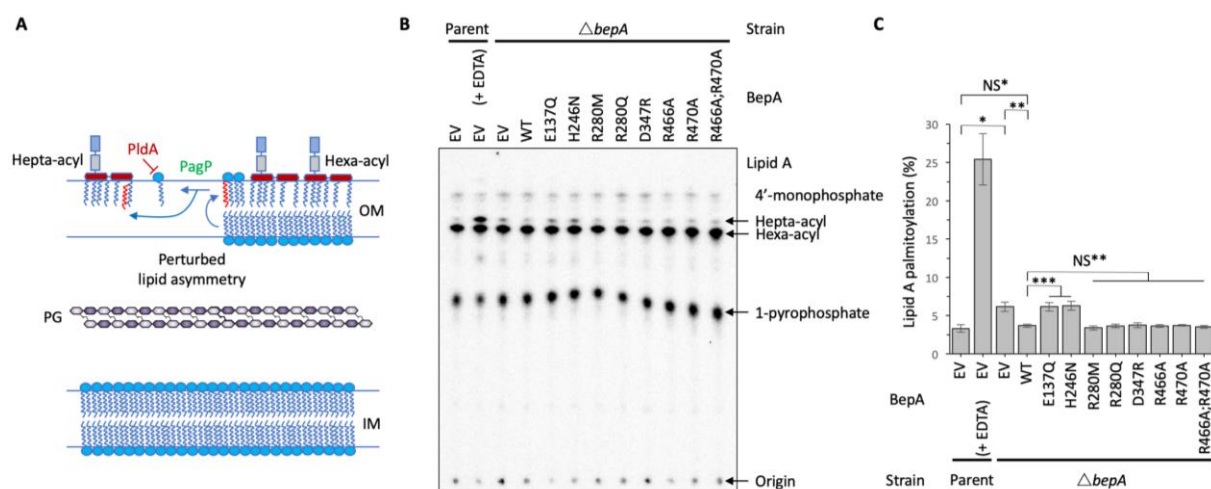

871  
872

### 873 **Figure 6 –Loss of BepA leads to surface exposed phospholipid**

874 The increased permeability of  $\Delta b e p A$  cells was hypothesised to be due to increased  
875 surface exposed phospholipid, therefore this was tested by the PagP mediated Lipid  
876 A palmitoylation assay, which detects surface exposed phospholipid. **A.** Schematic  
877 demonstrating the role of PagP in sensing and responding to surface exposed  
878 phospholipid. **B.** PagP mediated Lipid A palmitoylation assay. PagP transfers an acyl  
879 chain from surface exposed phospholipid to hexa-acylated Lipid A to form hepta-  
880 acylated Lipid A. [32-P]-labelled Lipid A was purified from cells grown to mid-  
881 exponential phase in LB broth with aeration. Equal amounts of radioactive material  
882 (cpm/lane) was loaded on each spot and separated by thin-layer chromatography  
883 before quantification. As a positive control, cells were exposed to 25 mM EDTA for 10  
884 min prior to Lipid A extraction in order to chelate  $Mg^{2+}$  ions and destabilise the LPS  
885 layer, leading to high levels of Lipid A palmitoylation. **C.** Hepta-acylated and hexa-  
886 acylated lipid A was quantified and hepta-acylated Lipid A represented as a  
887 percentage of total. Triplicate experiments were utilised to calculate averages and  
888 standard deviations with students t-tests used to assess significance. Student's *t*-tests:  
889 \* $P < 0.005$  significant compared with Parent EV; \*\* $P < 0.005$  significant compared with  
890  $\Delta b e p A$  EV; \*\*\*  $P < 0.001$  significant compared with  $\Delta b e p A$  WT; NS\*  $P > 0.1$  compared  
891 with Parent EV; NS\*\*  $P > 0.1$  compared with  $\Delta b e p A$  WT.

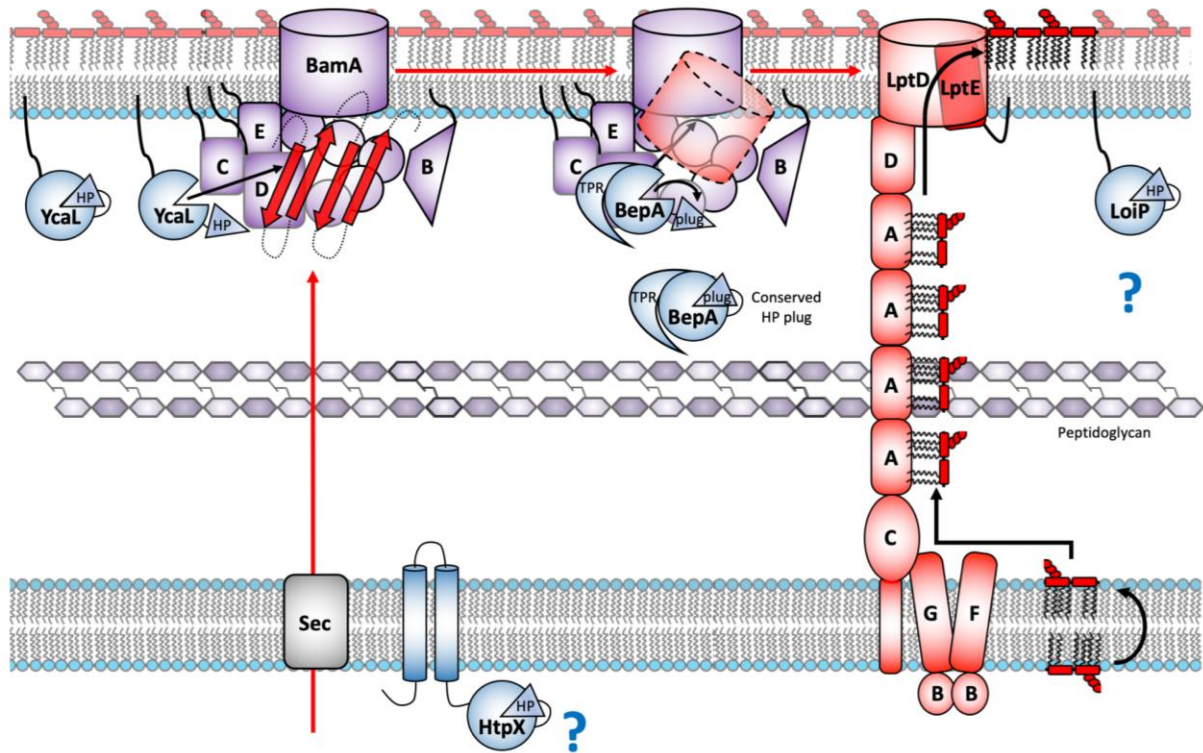

892  
893

894 **Figure 7 - Regulation of the stages of membrane protein biogenesis by the *E.***  
895 ***coli* HP-plug M48 metalloproteases**

896 Model for the proteolytic quality control of different stages in integral membrane protein  
897 biogenesis by the four *E. coli* M48 metalloproteases, HtpX, YcaL, BepA and LoIP,  
898 each of which contains the conserved regulatory HP active site plug (adapted and  
899 updated from Soltes *et al* (22)). HtpX is an IM localised M48 metalloprotease targeting  
900 misfolded integral membrane proteins, however the targets remain elusive. YcaL is an  
901 OM localised lipoprotein specifically targeting Bam-associated, unfolded, OMPs,  
902 whereas BepA is a periplasmic metalloprotease targeting the next stage in OMP  
903 biogenesis, Bam-engaged partially-folded  $\beta$ -barrels (22). Lastly, LoIP is another OM  
904 localised lipoprotein, however LoIP substrates remain uncharacterised. All four of the  
905 *E. coli* M48 metalloproteases encode a conserved regulatory active site plug  
906 mechanism and appear to be involved in proteolytic quality control of specific stages  
907 in integral membrane protein biogenesis.  
908



909 **Supporting information**

910

911 **Table S1 – Oligonucleotides used in this study**

912

| Name           | Sequence                                                                            | Targetted mutation |
|----------------|-------------------------------------------------------------------------------------|--------------------|
| yfgC E137Q Fwd | CTGGCTTCAGTTATGGCGCACCAGATCTCCCACGTCACCCAACG                                        | E137Q              |
| yfgC E137Q Rev | CGTTGGGTGACGTGGGAGATCTGGTGCGCCATAACTGAAGCCAG                                        | E137Q              |
| yfgC H246N Fwd | CGCCGGAAATTTTATTGACTAACCCGTTGCCGGAAAGTCGTCTG                                        | H246N              |
| yfgC H246N Rev | CAGACGACTTTCCGGCAACGGGTTAGTCAATAAAATTTCCGGCG                                        | H246N              |
| yfgC R280M fwd | GATTTCTATCTGGCGAAAGCGATGACACTGGGGATGTATAATTC                                        | R280M              |
| yfgC R280M rev | GAATTATACATCCCCAGTGTCATCGCTTTCGCCAGATAGAAATC                                        | R280M              |
| yfgC R280Q fwd | GATTTCTATCTGGCGAAAGCGCAGACACTGGGGATGTATAATT                                         | R280Q              |
| yfgC R280Q rev | GAATTATACATCCCCAGTGCTGCGCTTTCGCCAGATAGAAATC                                         | R280Q              |
| yfgC D347R fwd | CTGGCAACGCATGGTATCTCCGTCTGGCTACTGATATCGATC                                          | D347R              |
| yfgC D347R rev | GATCGATATCAGTAGCCAGACGGAGATACCATGCGTTGCCAG                                          | D347R              |
| yfgC R466A fwd | GGCAGCCTGCAACAAGCGGCTTACGATGCGCGCATCGAC                                             | R466A              |
| yfgC R466A rev | GTTCGATGCGCGCATCGTAAGCCGCTTGTTGCAGGCTGCC                                            | R466A              |
| yfgC R470A fwd | CAAGCGCGTTACGATGCGGCCATCGACCAGTTGCGCCAGC                                            | R470A              |
| yfgC R470A rev | GCTGGCGCAACTGGTTCGATGGCCGCATCGTAACGCGCTTG                                           | R470A              |
| yfgC E103C fwd | GACACCGTTTTCATTTTTTTCTGATCAACAACGACTGCATTAACG<br>CCTTTGCTTTCTTTGGCGGCAACG           | E103C              |
| yfgC E103C rev | CGTTGCCGCCAAAGAAAGCAAAGGCGTTAATGCAGTCGTTGTT<br>GATCAGAAAAAATGAAACGGTGTC             | E103C              |
| yfgC E241C fwd | CTCGATCAGGCGCGTACTCCTCGCGCCCGCCGTGCATTTTAT<br>TGACTCACCCGTTGCCGGAAAGTCGTCTGGCAGATG  | E241C              |
| yfgC E241C rev | CATCTGCCAGACGACTTTCCGGCAACGGGTGAGTCAATAAAAT<br>GCACGGCGGGCGCGAGGAGTAACGCGCCTGATCGAG | E241C              |

913

914

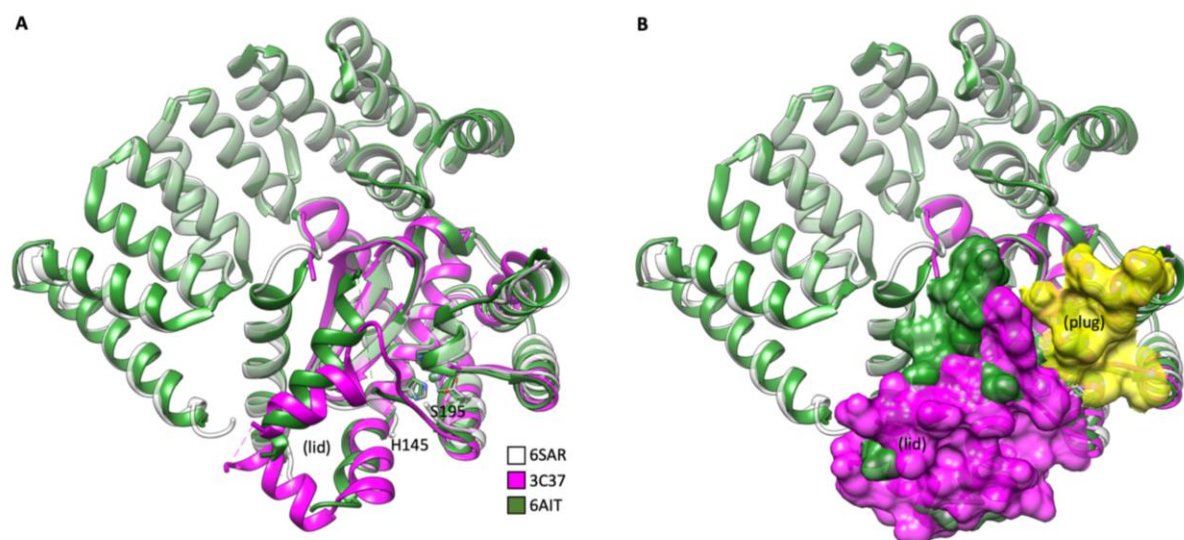

915  
916  
917  
918  
919  
920  
921  
922  
923  
924  
925  
926

**Figure S1 - Comparison of PDB: 3C37 and BepA shows the active site lid**  
Comparison of the *Geobacter sulfureducens* M48 protease structure (PDB: 3C37 – magenta) with that of the BepA structure presented here (PDB: 6SAR – white) and that presented previously (6AIT – green) shows the active site lid formed by the missing residues H145-S195. **A.** Alignment of 6SAR, 6AIT and 3C37 as ribbon representation **B.** Alignment of 6SAR, 6AIT and 3C37 as ribbon representation with surface representation shown for the active site plug of 6SAR (yellow) and the active site lid of 3C37 (magenta) and 6AIT (green) to demonstrate occlusion of the BepA active site.

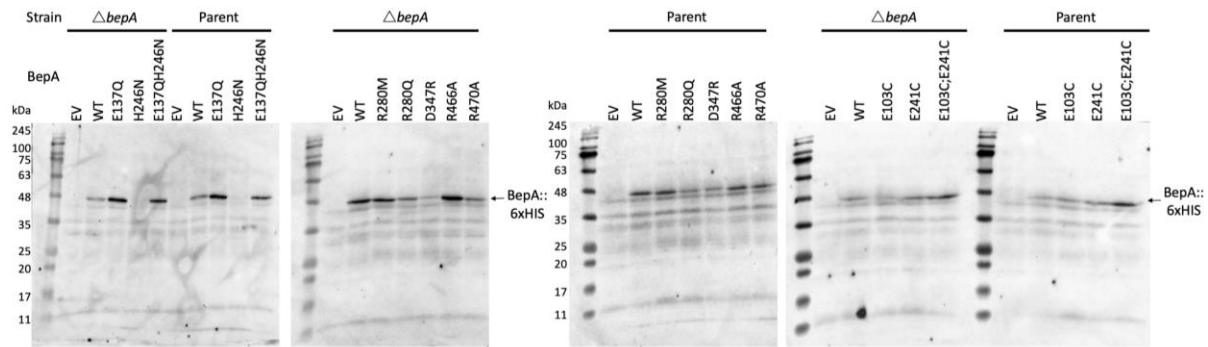

927  
928

929 **Figure S2 - Western immuno-blotting analysis of BepA::6xHis expression**

930 Analysis of BepA expression by western immuno-blotting analysis. Cells carrying  
931 pET20b encoding WT or mutated copies of BepA in the parent or  $\Delta$ *bepA* strain  
932 background were harvested and resuspended in Laemmli buffer so that the number  
933 of cells in each sample was equal. Following a brief centrifugation step, proteins were  
934 separated by SDS-PAGE and transferred by western blot. The empty vector control is  
935 labelled EV. Western blotting was completed using anti-6xHis antibody raised in mice  
936 and anti-mouse::HRP secondary antibody to target the BepA::6xHis protein in  
937 samples used for vancomycin sensitivity screens.

938

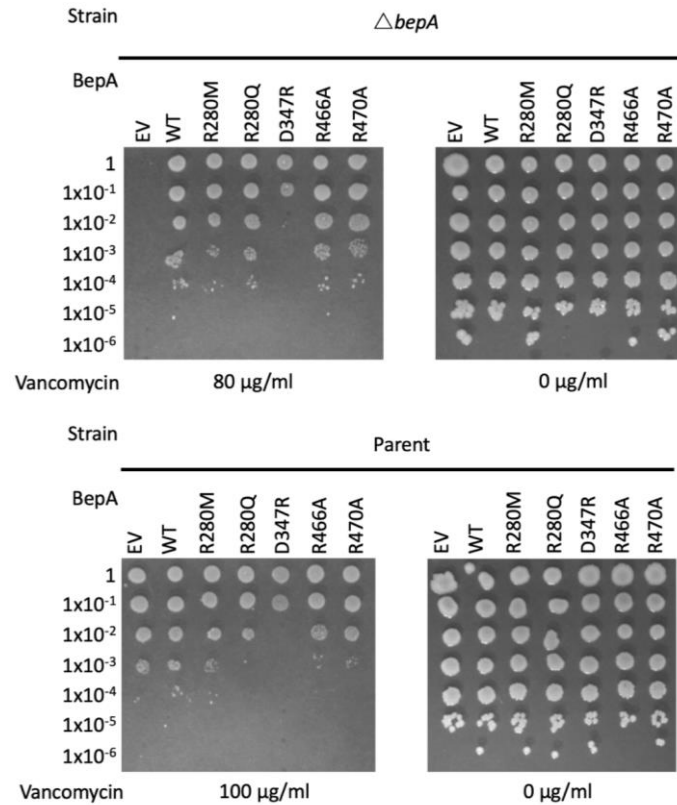

939  
940

941 **Figure S3 – Vancomycin sensitivity screen for pocket and TPR cavity mutants**  
942 Screen for vancomycin sensitivity of cells carrying pET20b encoding WT or mutant  
943 copies of BepA in the parent or  $\Delta bepA$  strain background. The empty vector control is  
944 labelled EV. Cells are normalised to OD<sub>600</sub> = 1 and ten-fold serially diluted before being  
945 spotted on the LB agar containing the indicated antibiotics (all plates contain 100 μg/ml  
946 carbenicillin additionally).

947  
948  
949

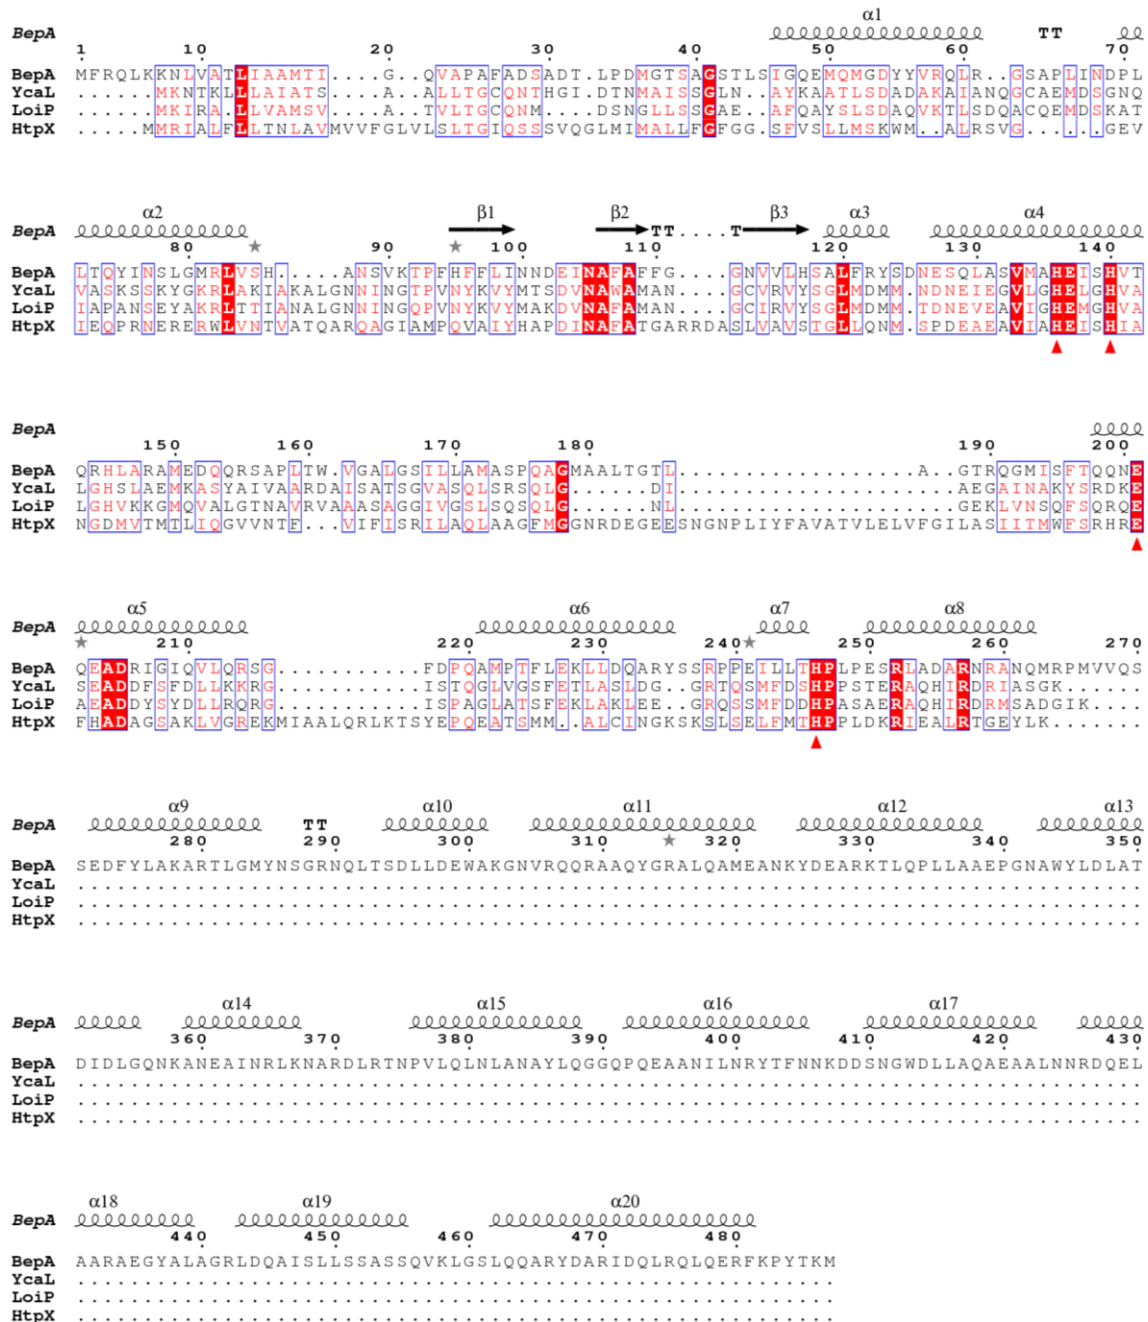

950  
951  
952  
953  
954  
955  
956  
957  
958  
959  
960  
961  
962

### Figure S4 – Full multiple alignment of BepA, YcaL, LoiP and HtpX

Amino acid sequences for *E. coli* BepA, YcaL, LoiP and HtpX were submitted to Clustal Omega (<https://www.ebi.ac.uk/Tools/msa/clustalo/>) in order to generate a multiple alignment to allow analysis of amino acid conservation and subsequently processed using ESPrpt 3.0 (<http://esprpt.ibcp.fr>) (49, 50). Sequences are named on the left and numbered above the line based on the BepA sequence. Gaps in the alignment are represented by dots. A single fully conserved residue is highlighted red and the zinc co-ordinating residues are labelled with a red triangle under the residue. BepA secondary structure is represented on the top line with  $\alpha$ -helices labelled with a spiral and  $\beta$ -sheets by arrows.
